1 **Aquaporins are main contributors of root hydraulic conductivity in pearl**  
2 **millet [*Pennisetum glaucum* (L) R. Br.]**

3

4

5 Alexandre Grondin<sup>1,2,3,4\*</sup>, Pablo Affortit<sup>1,2</sup>, Christine Tranchant-Dubreuil<sup>1</sup>, Carla de la Fuente  
6 Cantó<sup>1</sup>, Cédric Mariac<sup>1</sup>, Pascal Gantet<sup>1</sup>, Vincent Vadez<sup>1,5</sup>, Yves Vigouroux<sup>1</sup>, Laurent Laplaze<sup>1,2</sup>

7

8

9 <sup>1</sup> UMR DIADE, IRD, Université de Montpellier, Montpellier, France

10

11 <sup>2</sup> Laboratoire mixte international Adaptation des Plantes et microorganismes associés aux  
12 Stress Environnementaux, Dakar, Senegal

13

14 <sup>3</sup> Laboratoire Commun de Microbiologie, Dakar, Senegal

15

16 <sup>4</sup> Centre d'Etude Régional pour l'Amélioration de l'Adaptation à la Sécheresse, Thiès, Senegal

17

18 <sup>5</sup> International Crops Research Institute for Semi-Arid Tropics (ICRISAT), Patancheru, India

19

20

21 \* Corresponding author

22 E-mail: [alexandre.grondin@ird.fr](mailto:alexandre.grondin@ird.fr)

23

## 24 **Abstract**

25 Pearl millet is a key cereal for food security in arid and semi-arid regions but its yield is  
26 increasingly threatened by water stress. Physiological mechanisms consisting in saving water  
27 or increasing water use efficiency can alleviate that stress. Aquaporins (AQP) are water  
28 channels contributing to plant hydraulic balance that are supposedly involved in these  
29 mechanisms by mediating root water transport. However, AQP remain largely  
30 uncharacterized in pearl millet. Here, we studied AQP function in root water transport in two  
31 pearl millet lines contrasting for water use efficiency (WUE). We observed that these lines  
32 were also contrasting for root hydraulic conductivity (L<sub>pr</sub>) and AQP contribution to L<sub>pr</sub>, the  
33 line with lower WUE showing significantly higher AQP contribution to L<sub>pr</sub>. To investigate the  
34 AQP isoforms contributing to L<sub>pr</sub>, we developed genomic approaches to first identify the  
35 entire AQP family in pearl millet and second study the plasma membrane intrinsic proteins  
36 (PIP) gene expression profile. We identified and annotated 33 AQP genes in pearl millet among  
37 which ten encoded PIP isoforms. *PgPIP1-3* and *PgPIP1-4* were significantly more expressed in  
38 the line showing lower WUE, higher L<sub>pr</sub> and higher AQP contribution to L<sub>pr</sub>. Overall, our study  
39 suggests that AQP from the PIP1 family are the main contributor of L<sub>pr</sub> in pearl millet and are  
40 possibly associated to whole plant water use mechanisms. This study paves the way for further  
41 investigations on AQP functions in pearl millet hydraulics and adaptation to environmental  
42 stresses.

43

44 **Key-words:** pearl millet, aquaporin, water, roots.

45

46 The newly sequenced nucleotide sequences reported in this article have been submitted to  
47 GenBank under the submission number 2333840 (TPA grp467567). Assignment of GenBank  
48 accession number is in process.

49

## 50 Introduction

51 Plant hydraulics depends on soil water capture by roots, transport to the leaves and diffusion  
52 as vapor from the stomatal cavity to the atmosphere. In this plant hydraulic continuum, the  
53 radial water transport from the soil solution to the xylem vessels uses two paths: the  
54 apoplastic path where water can flow along the cell wall structures, and the cell to cell path  
55 where water can flow across cell membranes (transcellular) or along cytoplasmic continuities  
56 formed by plasmodesmata (symplastic) [1]. Extracellular hydrophobic barriers of lignin and  
57 suberin located in the endodermis are thought to restrict diffusion of water along the  
58 apoplastic path [2]. In the presence of such barriers, the cell to cell path is favored by water  
59 channels present in cell membranes called aquaporins [3].

60 Aquaporins (AQP) are present throughout the living kingdom at the exception of  
61 thermophilic Archaea and intracellular bacteria [4]. They belong to the Major Intrinsic Proteins  
62 (MIP) superfamily and are characterized by six transmembrane domains and two highly  
63 conserved Asn-Pro-Ala (NPA) motifs [5]. Other typical signatures of AQP consist in selectivity  
64 filters domains structuring the pore and composed of the aromatic/arginine (ar/R) motifs and  
65 the Froger's residues [6,7]. In higher plants, AQP isoforms fall into five families comprising the  
66 Plasma membrane Intrinsic Proteins (PIP), the Tonoplast Intrinsic Proteins (TIP), the  
67 Nodulin26-like Intrinsic Proteins (NIP), the Small Intrinsic Proteins (SIP) and the  
68 uncharacterized (X) Intrinsic Proteins (XIP) [8]. Although plant AQP have been localized  
69 throughout the cell secretory system, PIP, NIP and XIP are preferential residents of the plasma  
70 membranes while TIP accumulate in the tonoplast and SIP in the endoplasmic reticulum [9–  
71 11]. Functional studies combined with modelling approaches demonstrated that, more than  
72 being permeable to water, AQP possess a wide range of selectivity profiles [12,13]. Some PIP

73 isoforms are thereby permeable to H<sub>2</sub>O<sub>2</sub> and CO<sub>2</sub>, some TIP isoforms to NH<sub>3</sub> and urea, and  
74 some NIP to small organic solutes or mineral nutrients [14–18]. AQP possess wide range of  
75 physiological functions and have now been identified in a number of crop species such as rice,  
76 maize, tomato, cotton, sorghum, *Setaria italica*, watermelon or *Cannabis sativa* [19–24].

77 In plants, AQP are involved in water transport in both roots and shoots. In Arabidopsis  
78 for instance, isoforms AtPIP2-2 and AtPIP1-2 contributes to around 14% and 20% of the root  
79 osmotic conductivity and shoot hydraulic conductivity, respectively [25,26]. AQP also have  
80 important roles in plant growth, CO<sub>2</sub> fixation, nutrient allocation, reproduction or biotic  
81 interactions [8]. In recent years, AQP functions in plant water relations have received more  
82 attention as a potential target for crop improvement, particularly to increase tolerance to  
83 drought [27–32]. For instance, AQP could regulate root water transport in order to match  
84 transpiration and therefore contribute to mitigate disparity between water supply and  
85 demand in soybean upon “atmospheric” water stress caused by high evaporative demand  
86 [33]. This assumption is supported by the increased AQP expression and root hydraulic  
87 conductivity upon transpiration demand in rice and grapevine [34,35]. Furthermore,  
88 overexpression of *SiTIP2-2* in tomato increased transpiration rate and was associated with  
89 improved fruit yield upon moderate soil water stress [36]. Conversely, in other crops more  
90 adapted to hot and dry climates such as pearl millet, lower transpiration under high vapor  
91 pressure deficit (VPD) has been proposed to be beneficial for tolerance to “atmospheric”  
92 water stress and potentially associated with AQP function in root hydraulics [30,37,38].  
93 Therefore, AQP may be involved in different physiological mechanisms that determine the  
94 extent of water usage by the plant [39]. In fact, specific isoforms might be involved in different  
95 scenarios, calling for a better understanding of AQP family members and their functions in  
96 crops [28].

97 Pearl millet [*Pennisetum glaucum* (L) R Br.] is a key cereal for food security in arid and  
98 semi-arid regions [40]. However, its yield remain low and is often affected by climate  
99 unpredictability (heat waves and dry spells) that are forecast to worsen in future climate  
100 change scenarios [41,42]. The recent release of the pearl millet genome has opened new ways  
101 for functional genomic-based efforts aiming at improving its yield and tolerance to abiotic  
102 stresses [43]. In this study, we evaluated the potential links between AQP function in roots  
103 and water use, a drought tolerance-related trait, by measuring AQP contribution to L<sub>pr</sub> and  
104 AQP genes expression in the roots of two pearl millet inbred lines contrasting for water use  
105 efficiency. To have more insights into the AQP isoforms contributing to root hydraulics, we  
106 characterized the entire AQP family in pearl millet using a genomic approach.

107

## 108 **Materials and methods**

### 109 **Plant material and growth conditions**

110 IP4952 and IP17150, two pearl millet inbred lines that are part of the Pearl Millet inbred  
111 Germplasm Association Panel (PMiGAP) were used in this study [43]. The water use efficiency  
112 of these two lines was characterized across two lysimeters experiments performed under  
113 well-irrigated conditions at the International Crops Research Institute for the Semi-Arid  
114 Tropics (ICRISAT, India) according to [44]. These experiments indicated that IP4952 and  
115 IP17150 displayed relatively low and high water use efficiency, respectively (2.35 versus 3.72)  
116 [45] These two lines were used for root hydraulic conductivity measurements and AQP  
117 expression analyses in which plant were grown in hydroponic conditions into a nethouse at  
118 the IRD/ISRA Bel Air research station (Dakar, Senegal; 14.701615 N – 17.425359 W). Plants  
119 were germinated in Petri dishes into a chamber at 37°C for two days in the dark. Plants were

120 further exposed to light (37°C, 12h day/night cycle) for one day before being transplanted on  
121 top of a black mat covering a 30L container (45x40x24 cm containing 40 plants in total) filled  
122 with half strength Hoagland solution [46]. The system allowed roots to strictly develop in the  
123 nutrient solution without been exposed to light. Oxygen was provided to the roots through  
124 constant bubbling of the solution using an air pump.

125

## 126 **Root hydraulic conductivity and aquaporin contribution**

127 Root hydraulic conductivity ( $L_{pr}$ ) was measured in April-Mai 2019 (17/34°C and 34/100% in  
128 minimum/maximum temperature and humidity, respectively) from 9AM to 12PM on 15 days  
129 old plants grown in hydroponic conditions. The average temperature, relative humidity and  
130 VDP at the time of measurements were  $24.4 \pm 0.3^\circ\text{C}$  ,  $75.1 \pm 1.2\%$  and  $0.8 \pm 0.1$ , respectively.  
131 Plants were grown sequentially to be analyzed at the same age in a randomized design taking  
132 into account the time of measurement.  $L_{pr}$  measurements were performed using a pressure  
133 bomb (model 1000, PMS instrument company, USA) according to [47] and [48]. Briefly, plants  
134 were inserted into the pressure chamber filled with nutrient solution complemented or not  
135 by 2mM of azide ( $\text{NaN}_3$ ). The hypocotyl was carefully threated through the silicone grommet  
136 of the pressure chamber lid while the intact root system was sealed into the chamber. Roots  
137 were pressurized with compressed air at 0.4 MPa for 5 min to equilibrate, followed by xylem  
138 sap collection at 0.1, 0.2 and 0.3 MPa for 5 min using pre-weighed 2 ml Eppendorf tubes filled  
139 with cotton placed on top of the stem. The mass of xylem sap exuded at each pressure was  
140 determined by weighing and used to calculate the xylem sap flow (slope of xylem sap weight  
141 at each pressure). After the measurements, roots systems were scanned to determine root  
142 surface area using WhinRhizo Pro version 2012b (Regent Instruments, Canada). Xylem sap flux

143 was divided by root surface area to calculate Lpr. AQP contribution to Lpr was estimated using  
144 relative Lpr inhibition by azide calculated as:

$$145 \quad 100 - ((Lpr_{\text{azide\_individual\_replicate}} \times 100) / Lpr_{\text{no\_azide\_variety\_mean}}) \quad (1)$$

146

## 147 **Aquaporins genome-wide identification**

148 A total of 772 AQP protein sequences from 19 plant species (*Arabidopsis thaliana*, *Beta*  
149 *vulgaris*, *Brachypodium distachyon*, *Cicer arietinum*, *Gossypium hirsutum*, *Glycine max*,  
150 *Hordeum vulgare*, *Linum usitatissimum*, *Musa acuminata*, *Panicum virgatum*, *Pennisetum*  
151 *glaucum*, *Populus tremula*, *Oryza sativa*, *Setaria italica*, *Solanum lycopersicum*, *Solanum*  
152 *tuberosum*, *Sorghum bicolor*, *Vitis vinifera* and *Zea mays*) were aligned against the pearl millet  
153 genome (ASM217483v2) and the non-assembled scaffolds [43] using tblastn with an e-value  
154 of  $10^{-5}$  as initial cut-off to identify high scoring pairs. High scoring pairs were further filtered  
155 to keep those with a bit score  $\geq 100$ . Hot-spots of high scoring pairs were identified and  
156 redundant high scoring pairs were filtered to keep those with highest bit-score for further  
157 analysis (S2 Table). The filtered high scoring pairs locations in the pearl millet genome were  
158 used to identify regions with homologies to AQP genes.

159

## 160 **Structural annotation**

161 Correspondence between selected high scoring pairs and annotated genes in the pearl millet  
162 genome was determined. Potential AQP genes were identified and their genomic sequence  $\pm$   
163 1000pb upstream and downstream of the start/end position was retrieved as well as the  
164 predicted gene structure [43]. When predicted AQP did not correspond to previously  
165 annotated genes, the GENSCAN Web Server (<http://hollywood.mit.edu/GENSCAN.html>) was

166 used to predict the exon-intron structure of the genomic region. Putative AQP genomic  
167 sequences were aligned against the Plant EST (downloaded in August 2018) and the  
168 UniProt/Swiss-Prot plant protein (February 2016) databases and manually annotated using  
169 the Artemis software (version 17.0.1, Sanger Institute, UK; S3 Table). Annotation was  
170 confirmed by aligning reads from pearl millet transcriptomes [49] on the pearl millet genome  
171 using the Tablet software (version 1.19.09.03) [50] and coding and protein sequences were  
172 generated. AQP gene structure were further visualized using GSDS2.0 software [51].

173

## 174 **Sequencing**

175 AQP genes showing missing sequences in or bordering coding regions were resequenced (S3  
176 Table) using genomic DNA or cDNA from Tift 23D2B1 (genotype used to draft the pearl millet  
177 whole genome sequence). DNA was prepared using DNeasy Plant mini extraction kit (Qiagen,  
178 Germany) while cDNA was prepared by first extracting RNA using the RNeasy Plant mini  
179 extraction kit (Qiagen, Germany) followed by DNase treatment (RNase-free DNase set;  
180 Qiagen, Germany) and reverse transcription reaction (Omniscrypt RT kit; Qiagen, Germany)  
181 according to the manufacturer's instructions. Corresponding DNA/cDNA fragments were  
182 amplified using the Phusion high-fidelity DNA polymerase (Thermo Scientific, USA), purified  
183 (GeneClean turbo kit, MP Biomedicals, USA) and sent for sequencing (Eurofins Genomics,  
184 Germany). Primers used for amplification are presented in S4 Table. Difficulties in amplifying  
185 the missing sequence of PgTIP5-1 were encountered. In that specific case, we used  
186 unpublished MINION reads (Mariac, Vigouroux, Berthouly-Salazar; unpublished) to complete  
187 its sequence. Missing nucleotides were added to the pearl millet genomic sequence and  
188 coding frame of the corresponding new protein was carefully checked.

189



## 190 **Identification of functional motifs and transmembrane domains**

191 The NCBI conserved domain database (CDD) was used to identify NPA motifs and  
192 aromatic/arginine (ar/R) selectivity filters in the putative AQP protein sequences. Froger's  
193 residues were identified according to [6]. The number and location of the transmembrane  
194 domains were studied using TMHMM (<http://www.cbs.dtu.dk/services/TMHMM/>), TMPred  
195 ([https://embnet.vital-it.ch/software/TMPRED\\_form.html](https://embnet.vital-it.ch/software/TMPRED_form.html)) and Phyre2 [52]. Protein  
196 sequences were aligned using the CLUSTALW alignment function in the Mega7 software  
197 (version 7.0.26) [53]. Alignments were colored using the Color Align Properties program  
198 ([https://www.bioinformatics.org/sms2/color\\_align\\_prop.html](https://www.bioinformatics.org/sms2/color_align_prop.html)). Conserved domains as well  
199 as transmembrane domains were further manually analyzed to detect sequence alterations.  
200 Three-dimensional geometry structure and pore morphology of PIP was obtained using the  
201 PoreWalker software (<https://www.ebi.ac.uk/thornton-srv/software/PoreWalker/>).

202

## 203 **Phylogenetic analysis**

204 Phylogenetic analyses of *P. glaucum* AQP (PgAQP) was analyzed in relation to AQP identified  
205 in *A. thaliana* (AtAQP), *O. sativa* (OsAQP) and *P. tremula* (PtAQP) using the Mega7 software  
206 (version 7.0.26) [53]. PgAQP, AtAQP, OsAQP and PtAQP protein sequences were aligned using  
207 the CLUSTAW function and phylogenetic tree was built using the maximum likelihood method  
208 with 1000 reiterations. This allowed determination of the statistical stability of each node.  
209 Based on their position in the phylogenetic tree, PgAQP isoforms were classified into PIP, SIP,  
210 TIP and NIP families and named according to their close homologs.

211

## 212 **Expression profiling**

213 *P. glaucum* PIP (PgPIP) genes expression were measured in root of 15 days old plants grown  
214 in hydroponic conditions using quantitative polymerase chain reaction (RT-PCR). Roots  
215 (seminal + one crown root) were sampled between 10AM to 12PM. Sampled roots were  
216 immediately frozen into liquid nitrogen and ground using a TissueLyser II (Qiagen). RNA and  
217 cDNA (from 1 $\mu$ g of RNA) were prepared using extraction kits as described above. RT-PCR was  
218 performed with 1 $\mu$ L of diluted cDNA (1:9) in a Brilliant III ultra fast SYBRgreen QPCR master  
219 mix (Agilent Technologies, USA) using a StepOnePlus Real-Time PCR System (Applied  
220 biosystems, USA). Primers used to amplify the different PgPIP genes were checked for  
221 specificity and efficiency prior to the experiment (S5 Table). The pearl millet Ubiquitin gene  
222 (*Pgl\_GLEAN\_10001684*) was used as reference and PgPIP relative expression was calculated  
223 according to the delta-delta ct method.

224 PgAQP expression in shoots were retrieved from [49]. Data from leaves and  
225 inflorescence of ten open pollinated cultivated pearl millet varieties were used [49].

226

## 227 **Statistics**

228 Statistical analyses were performed using R version 3.5.2 (R Development Core Team, 2018)  
229 using ANOVA (aov script) to detect significant differences. Least Significant Difference (LSD)  
230 test within the Agricolae package was used to group differences in letter classes.

231

## 232 **Results**

### 233 **Pearl millet aquaporin contribution to root hydraulic conductivity**

234 In order to evaluate if AQP function in root radial water flow could be associated with water  
235 use in pearl millet, we measured root hydraulic conductivity (Lpr) in IP4952 and IP17150,

236 previously described as low and high water use efficiency lines respectively. IP4952 showed  
237 1.4 times higher Lpr than IP17150 ( $1.30\text{E-}07 \pm 2.36\text{E-}08$  versus  $9.27\text{E-}08 \pm 8.33\text{E-}09$   $\text{m}^3 \text{m}^{-2} \text{s}^{-1}$   
238  $\text{MPa}^{-1}$  respectively;  $n=15$ ) but this difference was not significant ( $p = 0.148$ ; Fig 1 and S1 Table).  
239 In both IP4952 and IP17150, treatment with azide, an inhibitor of AQP activity, led to  
240 significant Lpr reduction to  $2.00\text{E-}08 \pm 2.44\text{E-}09$  and  $2.19\text{E-}08 \pm 2.32\text{E-}09$   $\text{m}^3 \text{m}^{-2} \text{s}^{-1} \text{MPa}^{-1}$   
241 respectively ( $p < 0.001$ ; S1 Table). This effect of azide application on Lpr was mostly reversible  
242 after treating the same roots with azide-free solution (S1 Fig). AQP contribution to Lpr was  
243 significantly higher in IP4952 (low water use efficiency) as compared to IP17150 (high water  
244 use efficiency;  $84.64 \pm 1.98\%$  versus  $76.40 \pm 2.61\%$ ,  $p < 0.05$ ; S1 Table). These data indicate  
245 that AQP could contribute more than 75% to Lpr in pearl millet.

246

247 **Fig 1. Root hydraulic conductivity and aquaporin contribution in roots of IP4952 and**  
248 **IP17150.** Root hydraulic conductivity (Lpr) were measured in plants grown in hydroponic  
249 conditions between 9AM to 12PM in presence or not of 2mM azide. (A) Lpr values measured  
250 in absence of azide. (B) Aquaporin contribution to Lpr was calculated as relative Lpr inhibition  
251 by azide. Bars represent mean values  $\pm$  se of  $n=10-15$  plants. \*:  $p < 0.05$ .

252

## 253 **Aquaporin identification and annotation**

254 To have more insight in the AQP isoforms contributing to Lpr in pearl millet, we characterized  
255 the AQP genes family in the pearl millet genome. We blasted 772 AQP from the PIP, TIP, SIP,  
256 NIP and XIP families identified in 19 different species on the pearl millet reference genome  
257 (chromosome assembly and scaffolds) [43]. A total of 7005 sequences with bit score  $>100$ ,  
258 representing 50 specific hits spread on the genome were identified (S2 Table). Forty-seven of  
259 the hits fall into previously annotated genes, one fall in a non-annotated part of the genome

260 on chromosome 5, and two in non-assembled parts of the genome (scaffold763 and  
261 scaffold8428).

262 Manual *de novo* annotation of the 50 putative AQP genes allowed the identification of  
263 eight genes with no start or with early stop codon in the first exon that were classified as  
264 pseudo-genes (S3 Table). Nine genes did not encode AQP isoforms but zinc-finger protein/LRR  
265 receptor-like serine-threonine protein kinase families or DEAD-like helicase-N superfamily,  
266 respectively. The absence of AQP signature domains (NPA and Ar/R motifs) in their protein  
267 sequence confirmed their non-affiliation to the AQP family. A number of genes showed an  
268 excessive number of exons or longer first exon and were re-annotated on the basis of  
269 alignment with transcriptome sequences or with close protein homologs (Uniprot/Swiss-Prot  
270 blast results) and presence of AQP isoform conserved domains. In addition, ten genes showed  
271 missing sequences in coding regions that were completed after sequencing. Overall, 33  
272 *Pennisetum glaucum* AQP (PgAQP) genes were identified in the pearl millet genome, among  
273 which sixteen were *de novo* annotated (Table 1).

274 **Table 1. Description and distribution of the aquaporins genes identified in pearl millet.**

| ID                                               | Gene            | Pgl_Glean ID              | Gene length (bp) | Transcript length (bp) | Protein length (aa) | Protein MW (kD) | Chr         | Start     | End       |
|--------------------------------------------------|-----------------|---------------------------|------------------|------------------------|---------------------|-----------------|-------------|-----------|-----------|
| <b>Plasma membrane intrinsic proteins (PIP)</b>  |                 |                           |                  |                        |                     |                 |             |           |           |
| 1                                                | <i>PgPIP1-1</i> | <i>Pgl_GLEAN_10001520</i> | 3097             | 867                    | 288                 | 30.70           | 3           | 5721622   | 5724718   |
| 2                                                | <i>PgPIP1-3</i> | <i>Pgl_GLEAN_10010809</i> | 1601             | 867                    | 288                 | 30.76           | 3           | 274573998 | 274575598 |
| 3                                                | <i>PgPIP1-4</i> | <i>Pgl_GLEAN_10005724</i> | 992              | 900                    | 298                 | 31.38           | 2           | 104247932 | 104248932 |
| 4                                                | <i>PgPIP2-1</i> | <i>Pgl_GLEAN_10028064</i> | 2920             | 873                    | 290                 | 30.35           | 3           | 12453415  | 12456334  |
| 5                                                | <i>PgPIP2-2</i> | <i>Pgl_GLEAN_10028876</i> | 2830             | 867                    | 288                 | 30.12           | 3           | 45603209  | 45606038  |
| 6                                                | <i>PgPIP2-3</i> | <i>Pgl_GLEAN_10035675</i> | 1903             | 873                    | 290                 | 30.39           | 3           | 257669631 | 257671533 |
| 7                                                | <i>PgPIP2-5</i> | <i>Pgl_GLEAN_10028056</i> | 1062             | 834                    | 277                 | 28.93           | 3           | 12167791  | 12168852  |
| 8                                                | <i>PgPIP2-6</i> | <i>Pgl_GLEAN_10028055</i> | 1053             | 861                    | 286                 | 29.94           | 3           | 12156953  | 12158005  |
| 9                                                | <i>PgPIP2-7</i> | <i>Pgl_GLEAN_10010255</i> | 1170             | 861                    | 286                 | 29.79           | Scaffold763 | 240584    | 241753    |
| 10                                               | <i>PgPIP2-8</i> | <i>Pgl_GLEAN_10009812</i> | 837              | 837                    | 278                 | 29.17           | 2           | 64966663  | 64967453  |
| <b>Tonoplast intrinsic proteins (TIP)</b>        |                 |                           |                  |                        |                     |                 |             |           |           |
| 11                                               | <i>PgTIP1-1</i> | <i>Pgl_GLEAN_10002147</i> | 1499             | 750                    | 249                 | 25.72           | 5           | 153303973 | 153305471 |
| 13                                               | <i>PgTIP2-1</i> | <i>Pgl_GLEAN_10000631</i> | 844              | 744                    | 247                 | 24.88           | 2           | 30657555  | 30658398  |
| 16                                               | <i>PgTIP2-2</i> | <i>Pgl_GLEAN_10030617</i> | 933              | 747                    | 248                 | 25.03           | 3           | 100540239 | 100541171 |
| 12                                               | <i>PgTIP2-3</i> | <i>Pgl_GLEAN_10009584</i> | 851              | 750                    | 249                 | 25.06           | 3           | 33622445  | 33623295  |
| 15                                               | <i>PgTIP3-1</i> | <i>Pgl_GLEAN_10028702</i> | 911              | 801                    | 266                 | 27.41           | 2           | 44624536  | 44625481  |
| 14                                               | <i>PgTIP4-1</i> | <i>Pgl_GLEAN_10002901</i> | 2586             | 738                    | 245                 | 25.58           | 1           | 263875434 | 263878070 |
| 18                                               | <i>PgTIP4-2</i> | <i>Pgl_GLEAN_10003219</i> | 1455             | 744                    | 247                 | 25.15           | 3           | 148813464 | 148814777 |
| 17                                               | <i>PgTIP4-3</i> | <i>Pgl_GLEAN_10003218</i> | 844              | 747                    | 248                 | 25.10           | 3           | 148807632 | 148808412 |
| 19                                               | <i>PgTIP5-1</i> | <i>Pgl_GLEAN_10033583</i> | 1087             | 813                    | 270                 | 26.69           | 3           | 272599938 | 272601028 |
| <b>Noduline-26 like intrinsic proteins (NIP)</b> |                 |                           |                  |                        |                     |                 |             |           |           |
| 20                                               | <i>PgNIP1-1</i> | <i>Pgl_GLEAN_10012175</i> | 2316             | 846                    | 281                 | 29.52           | 2           | 195368171 | 195370486 |
| 21                                               | <i>PgNIP1-2</i> | <i>Pgl_GLEAN_10028618</i> | 2560             | 846                    | 281                 | 29.53           | 1           | 261387113 | 261389753 |
| 22                                               | <i>PgNIP1-4</i> | <i>Pgl_GLEAN_10028339</i> | 1137             | 837                    | 278                 | 29.36           | 3           | 145385690 | 145386826 |
| 23                                               | <i>PgNIP2-1</i> | <i>Pgl_GLEAN_10018521</i> | 3364             | 891                    | 296                 | 31.82           | 3           | 14105646  | 14109009  |
| 24                                               | <i>PgNIP2-2</i> | <i>Pgl_GLEAN_10019286</i> | 3821             | 894                    | 297                 | 31.57           | 2           | 103033018 | 103036838 |
| 25                                               | <i>PgNIP3-1</i> | <i>Pgl_GLEAN_10034621</i> | 3855             | 909                    | 302                 | 31.43           | 2           | 40497062  | 40500916  |
| 26                                               | <i>PgNIP3-2</i> | <i>Pgl_GLEAN_10030882</i> | 1151             | 846                    | 281                 | 29.60           | 4           | 55609410  | 55610656  |
| 27                                               | <i>PgNIP3-3</i> | <i>Pgl_GLEAN_10030883</i> | 1087             | 780                    | 259                 | 27.05           | 4           | 55648949  | 55650374  |
| 28                                               | <i>PgNIP3-4</i> | <i>Pgl_GLEAN_10030881</i> | 1258             | 750                    | 249                 | 25.15           | 4           | 55573901  | 55575272  |
| 29                                               | <i>PgNIP3-5</i> | <i>Pgl_GLEAN_10030872</i> | 934              | 837                    | 278                 | 27.79           | 4           | 55508562  | 55509419  |
| 30                                               | <i>PgNIP4-1</i> | <i>Pgl_GLEAN_10012100</i> | 1319             | 921                    | 306                 | 31.52           | 6           | 110090448 | 110091766 |
| <b>Small intrinsic proteins (SIP)</b>            |                 |                           |                  |                        |                     |                 |             |           |           |
| 31                                               | <i>PgSIP1-1</i> | <i>Pgl_GLEAN_10003744</i> | 2818             | 726                    | 241                 | 25.32           | 1           | 175152169 | 175154986 |
| 32                                               | <i>PgSIP1-2</i> | <i>Pgl_GLEAN_10014008</i> | 3375             | 759                    | 252                 | 25.91           | 4           | 93394125  | 93397493  |
| 33                                               | <i>PgSIP2-1</i> | <i>Pgl_GLEAN_10026167</i> | 1899             | 759                    | 252                 | 27.10           | 5           | 126489209 | 126491163 |

275 *PgPIP2-7* is located on scaffold763 that was not assembled to the pearl millet genome. bp:  
 276 base pairs; aa: amino-acids; MW: molecular weight; kD: kilo Dalton; Chr: chromosome; Start:  
 277 position of the ATG; End: position of the stop codon.  
 278

## 279 Pearl millet aquaporins phylogenetic analysis

280 To classify the PgAQP into families and name them, a phylogenetic tree was built using the  
 281 PgAQP protein sequences along with protein sequences from *Arabidopsis thaliana*, *Oryza*  
 282 *sativa* and *Populus tremula* (Fig 2). The PgAQP were named according to their grouping into  
 283 families (PIP, TIP, SIP or NIP) and close homologs (Table 1). Ten isoforms showed homologies  
 284 to the PIP family with three isoforms falling in the PIP1 sub-family (*PgPIP1-1*, *PgPIP1-3* and  
 285 *PgPIP1-4*) and seven isoforms falling in the PIP2 sub-family (*PgPIP2-1*, *PgPIP2-2*, *PgPIP2-3*,

286 PgPIP2-5, PgPIP2-6, PgPIP2-7 and PIP2-8). Nine isoforms from the *P. glaucum* TIP family  
287 (PgTIP), eleven isoforms from the *P. glaucum* NIP family (PgNIP) and three isoforms from the  
288 *P. glaucum* SIP family (PgSIP) were further identified. No isoforms from the XIP family were  
289 identified in pearl millet. This analysis further confirmed the classification of PgPIP1-1, PgPIP2-  
290 1, PgPIP2-3, PgPIP2-6, PgTIP1-1 and PgTIP2-2 cloned by [30]. However, PgPIP1-2 from [30] was  
291 renamed as PgPIP1-3 in this study.

292 PgAQP genes distribution in the pearl millet genome denoted that most of them were  
293 localized on chromosome 3 while none were localized on chromosome 7 (Fig 3). Two hot-  
294 spots of PgAQP genes were observed, one located in a region of 11899bp on chromosome 3  
295 containing *PgPIP2-1*, *PgPIP2-5* and *PgPIP2-6* and the other in a region of 141812bp on  
296 chromosome 4 containing *PgNIP3-2*, *PgNIP3-3*, *PgNIP3-4* and *PgNIP3-5*.

297

298 **Fig 2. Phylogenetic relationship among aquaporins isoforms from pearl millet, Arabidopsis,**  
299 **rice and poplar.** Tree was generated using the Maximum Likelihood method with 1000  
300 reiterations in MEGA7. Bootstrap values above 50% are represented. The PIP, TIP, SIP, NIP and  
301 XIP family clades are represented by blue, grey, purple, green and red, respectively. Pearl  
302 millet sequences are indicated by colored dots.

303

304 **Fig 3. Distribution of aquaporin genes in the pearl millet genome.** The seven chromosome  
305 (Chr) from the pearl millet genome are represented according to their size in megabase (Mb).  
306 Positions of PIP, TIP, SIP and NIP genes are represented in blue, purple, orange and green,  
307 respectively. *PgPIP2-7* which is located on scaffold763 is not represented.

308

309 **Aquaporin gene structure in pearl millet**

310 PgAQP genes showed large variation in gene length (ranging from 837bp for *PgPIP2-8* to  
311 3855bp for *PgNIP3;1*; Table 1). Transcript length were less variable and relatively conserved  
312 within families with lengths of around 800-900bp for the PgPIP and PgNIP genes, 750-800bp  
313 for the PgTIP genes and 700-750bp for the PgSIP genes.

314 To investigate associations between phylogenetic classification and gene structure, the  
315 intron-exon organization of the PgAQP genes was analyzed (S2 Fig). PgAQP genes displayed  
316 between one (*PgPIP2-8*) to five exons (*PgNIP2-1*, *PgNIP2-2* and *PgNIP4-1*). Except for the NIP  
317 family, intron-exon organization was generally conserved within families with 5/9 PgPIP genes  
318 displaying 3 exons, 6/9 PgTIP genes displaying 2 exons and all PgSIP genes displaying 3 exons,  
319 supporting their phylogenetic distribution. *PgPIP2-5/PgPIP2-6* and *PgNIP3-2/PgNIP3-3* that  
320 were found to be close homologs in the phylogenetic analysis (Fig 2) and closely located in the  
321 pearl millet genome (Fig 3) showed similar gene and transcript length (Table 1) as well as gene  
322 structure (S2 Fig). PgAQP coding regions encoded proteins with length varying between 250  
323 to 300 amino acids, with molecular weight of around 30kD for the PgPIP and PgNIP and 25kD  
324 for the PgTIP and PgSIP isoforms (Table 1).

325

## 326 **Pearl millet AQP conserved domains**

327 To investigate polymorphisms in the PgAQP isoforms conserved motifs that could underlay  
328 potential changes in structural and substrate selectivity, analyses of conserved and  
329 transmembrane domains were performed. The conserved domain analysis showed that all  
330 PgAQP isoforms belonged to the MIP super-family and displayed typical double NPA motifs  
331 (S6 Table and Table 2). Although some polymorphisms in the NPA motifs were observed in  
332 some isoforms (particularly from the NIP family) the subsequent amino-acids were of the  
333 same chemical properties (generally neutral and non-polar; Table 2, Fig 4 and S3-5 Fig). Ar/R

334 selectivity filters and Froger's residues known as AQP markers were well conserved in the  
335 PgPIP isoforms except for the Froger's residue on position 1 (P1; Table 2, Fig 4). More  
336 polymorphisms were observed in these residues for the PgTIP, PgNIP and PgSIP isoforms  
337 although the ar/R residue on Loop E (R on LE2) and the Froger's residues at positions 3 (A) and  
338 4 (F/Y) were well conserved across all isoforms (Table 2).

339 Transmembrane domains analyses using three different prediction softwares  
340 suggested a high probability for all identified PgAQP to display six transmembrane domains  
341 with cytoplasmic N-terminal and C-terminal ends as typically observed for AQP (S7 Table).  
342 Predictions of the 3-dimensional geometry structure and pore morphology suggested a  
343 continuous pore that runs longitudinally across both sides of the membranes for all PgPIP (S6  
344 Fig). Two deviations in the pore center were typically observed at both extremities illustrating  
345 the two constraints caused by the NPA motifs structured as alfa-helices and acting as  
346 selectivity filters.

347

348 **Fig 4. Conserved domains and membrane topology of the PIP isoforms from pearl millet.**

349 Alignment of the PIP isoforms were obtained using ClustalW in Mega7. Sequence identities  
350 and similarities (80%) are highlighted in colors. The transmembrane domains are represented  
351 by orange bars with the N-terminal and C-terminal ends of the protein located in the cytosol.  
352 NPA: Asparagine-Proline-Alanine motifs; \*: Aromatic/Arginine selectivity filters. #: Froger's  
353 residues.



354 **Table 2. Amino-acids residues in the conserved domains of the pearl millet aquaporins**  
 355 **isoforms.**

| Isoform                                          | NPA (LB) | NPA (LE) | Ar/R selectivity filters |    |     |     | Froger's residue |    |    |    |    |
|--------------------------------------------------|----------|----------|--------------------------|----|-----|-----|------------------|----|----|----|----|
|                                                  |          |          | H2                       | H5 | LE1 | LE2 | P1               | P2 | P3 | P4 | P5 |
| <b>Plasma membrane intrinsic proteins (PIP)</b>  |          |          |                          |    |     |     |                  |    |    |    |    |
| PgPIP1-1                                         | NPA      | NPA      | F                        | H  | T   | R   | Q                | S  | A  | F  | W  |
| PgPIP1-3                                         | NPA      | NPA      | F                        | H  | T   | R   | Q                | S  | A  | F  | W  |
| PgPIP1-4                                         | NPA      | NPA      | F                        | H  | T   | R   | V                | S  | A  | F  | W  |
| PgPIP2-1                                         | NPA      | NPA      | F                        | H  | T   | R   | Q                | S  | A  | F  | W  |
| PgPIP2-2                                         | NPA      | NPA      | F                        | H  | T   | R   | Q                | S  | A  | F  | W  |
| PgPIP2-3                                         | NPA      | NPA      | F                        | H  | T   | R   | Q                | S  | A  | F  | W  |
| PgPIP2-5                                         | NPA      | NPA      | F                        | H  | T   | R   | -                | S  | A  | F  | W  |
| PgPIP2-6                                         | NPA      | NPA      | F                        | H  | T   | R   | Q                | S  | A  | F  | W  |
| PgPIP2-7                                         | NPA      | NPA      | F                        | H  | T   | R   | T                | S  | A  | F  | W  |
| PgPIP2-8                                         | NPA      | NPA      | F                        | H  | T   | R   | H                | S  | A  | F  | W  |
| <b>Tonoplast intrinsic proteins (TIP)</b>        |          |          |                          |    |     |     |                  |    |    |    |    |
| PgTIP1-1                                         | NPA      | NPA      | H                        | I  | A   | V   | T                | S  | A  | Y  | W  |
| PgTIP2-1                                         | NPA      | TPA      | H                        | I  | G   | R   | T                | S  | A  | Y  | W  |
| PgTIP2-2                                         | NPA      | NPA      | H                        | I  | G   | R   | T                | S  | A  | Y  | W  |
| PgTIP2-3                                         | NPA      | NPA      | H                        | I  | G   | R   | T                | S  | A  | Y  | W  |
| PgTIP3-1                                         | NPA      | NPA      | H                        | V  | A   | R   | T                | V  | A  | Y  | W  |
| PgTIP4-1                                         | NPS      | NPA      | N                        | S  | A   | R   | T                | S  | A  | Y  | W  |
| PgTIP4-2                                         | NPA      | NPA      | Q                        | S  | A   | R   | T                | S  | A  | Y  | W  |
| PgTIP4-3                                         | NPA      | NPA      | H                        | I  | A   | H   | T                | S  | A  | Y  | W  |
| PgTIP5-1                                         | NPA      | NPA      | Q                        | V  | A   | R   | R                | S  | A  | Y  | W  |
| <b>Noduline-26 like intrinsic proteins (NIP)</b> |          |          |                          |    |     |     |                  |    |    |    |    |
| PgNIP1-1                                         | NPA      | NPA      | W                        | V  | A   | R   | F                | T  | A  | Y  | V  |
| PgNIP1-2                                         | NPA      | NPA      | W                        | V  | A   | R   | F                | T  | A  | Y  | F  |
| PgNIP1-4                                         | NPA      | NPV      | W                        | A  | A   | R   | F                | S  | A  | Y  | I  |
| PgNIP2-1                                         | NPA      | NPA      | G                        | S  | G   | R   | L                | T  | A  | Y  | F  |
| PgNIP2-2                                         | NPA      | NPA      | G                        | S  | G   | R   | L                | T  | A  | Y  | F  |
| PgNIP3-1                                         | NPS      | NPV      | A                        | I  | G   | R   | F                | T  | A  | Y  | L  |
| PgNIP3-2                                         | NPA      | NPA      | A                        | A  | A   | R   | Y                | T  | A  | Y  | M  |
| PgNIP3-3                                         | NPA      | NPA      | A                        | A  | A   | R   | Y                | T  | A  | Y  | M  |
| PgNIP3-4                                         | NPA      | NPA      | A                        | A  | A   | R   | Y                | T  | A  | Y  | M  |
| PgNIP3-5                                         | NPA      | NPA      | A                        | A  | A   | R   | Y                | T  | A  | Y  | M  |
| PgNIP4-1                                         | NPA      | NPI      | M                        | G  | G   | R   | M                | T  | A  | Y  | L  |
| <b>Small intrinsic proteins (SIP)</b>            |          |          |                          |    |     |     |                  |    |    |    |    |
| PgSIP1-1                                         | NPT      | NPA      | V                        | V  | P   | N   | M                | A  | A  | Y  | W  |
| PgSIP1-2                                         | NPT      | NPA      | L                        | I  | P   | N   | M                | A  | A  | Y  | W  |
| PgSIP2-1                                         | NPL      | NPA      | S                        | H  | G   | S   | F                | A  | A  | Y  | W  |

356 The two NPA (Asparagine-Proline-Alanine) motifs are located on loop B (LB) and loop E (LE). Aromatic/Arginine  
 357 motifs (Ar/R) are located on helix 2 (H2), helix 5 (H5), and loop E (LE1 and LE2). P1-5 designed the five Froger's  
 358 position.  
 359

## 360 **Aquaporin expression profiling in pearl millet**

361 Because of their localization at the plasma membrane, PIP isoforms play major roles in root  
 362 hydraulic conductivity. To infer PgPIP isoforms putative importance to Lpr in pearl millet, we  
 363 analyzed PgPIP gene expression pattern in roots of IP4952 and IP17150 using quantitative PCR.

364 PgPIP genes were generally more expressed in IP4952 as compared to IP17150 (Fig 5). In both  
365 lines, the most expressed genes in roots were *PgPIP1-1*, *PgPIP1-3*, *PgPIP1-4*, and *PgPIP2-3*  
366 while *PgPIP2-5*, *PgPIP2-6*, *PgPIP2-7* and *PgPIP2-8* were lowly expressed. *PgPIP1-3* and *PgPIP1-*  
367 *4* were the only genes significantly differentially expressed between both lines.

368 Expression of PgPIP in shoots (leaves and inflorescence) were retrieved from [49].  
369 Transcriptomic analyses from ten pearl millet varieties suggest that *PgPIP1-4* and *PgPIP2-3*,  
370 two of the most expressed genes in roots, are lowly expressed in shoots (S7 Fig). Conversely,  
371 *PgPIP1-1* and *PgPIP1-3* are highly expressed in roots and shoots.

372

373 **Fig 5. Relative expression of PIP genes in roots of IP4952 and IP17150.** Transcript abundance  
374 of each PIP genes were measured between 9AM and 12PM on plants grown in hydroponic  
375 conditions and normalized to the expression of *PgPIP2-5* in IP4952. Bars show mean values  $\pm$   
376 se of n=6-8 biological replicates, each with technical triplicates. Letters indicate different  
377 significance groups.

378

## 379 Discussion

380 Here, we studied the role of AQP in root water transport in pearl millet, a heat and drought-  
381 adapted crop. Root hydraulic conductivity ( $L_{pr}$ ) varied around  $1E-07 \text{ m}^3 \text{ m}^{-2} \text{ s}^{-1} \text{ MPa}^{-1}$ , in a  
382 range that has been previously reported in other plants [54]. Root treatment with a common  
383 AQP inhibitor (azide) suggested that AQP contribute up to 84% to the  $L_{pr}$  in pearl millet (S1  
384 Table). This figure is higher than what has been observed in Arabidopsis (57 to 64%) [55] and  
385 rice (42 to 79%) [56]. However, as complete reversion of  $L_{pr}$  inhibition by azide could be  
386 observed (S1 Fig), we do not think AQP contribution might have been over-estimated due to

387 azide secondary effects. Hence, our results suggest that PgAQP are major regulators of root  
388 water flow in pearl millet.

389 We used the pearl millet genome sequence to characterize the AQP gene family and  
390 identified thirty-three putatively functional AQP isoforms (based on conserved domains and  
391 protein topology) that belonged to the PIP (10), TIP (9), SIP (3) and NIP (11) families. No XIP  
392 were identified in pearl millet which confirm the absence of isoforms from this family in the  
393 monocotyledon clade [8]. The number of identified AQP in pearl millet is similar to what has  
394 been observed in *A. thaliana* (35) [57], rice (33) [22] and maize (31) [19]. Interestingly, AQP  
395 genes were over-represented on Chromosome 3 with fourteen genes (Fig 3). *PgPIP2-5* and  
396 *PgPIP2-6* closely located in Chromosome 3 are phylogenetically related and possess similar  
397 gene structure (Fig 3 and S2 Fig) suggesting possible tandem duplication events in this region  
398 [58]. Similarly, *PgNIP3-2* and *PgNIP3-3* located on Chromosome 4 may be the result of  
399 duplication events. Furthermore, *PgPIP2-7* was identified in scaffold763 suggesting that genes  
400 may be missing on parts of the pearl millet genome assembly.

401 The selectivity of plant AQP is defined by amino-acids structuring the pore that  
402 constitute their signatures. Among these amino-acids, the NPA motifs on loops B and E  
403 contribute with the dipole moment of the  $\alpha$ -helices to prevent proton permeation [59,60].  
404 These motifs were strictly conserved in the PgPIP but showed some polymorphisms for other  
405 isoforms (Table 2). However, these substitutions did not drastically change the positive  
406 electrostatic potential at the NPA motifs suggesting that proton exclusion from AQP pore is  
407 conserved in pearl millet. Furthermore, the Ile preceding the Froger's residue P4 and P5 at the  
408 end of Loop E, shown to be essential for CO<sub>2</sub> transport in PIP [61], is conserved in the PgPIP  
409 (Fig 4).

410 The ar/R motifs, composed of four amino-acids forming a constriction at the  
411 extracytosolic entry of the pore, represent the main selectivity filter. Modelling approaches  
412 based on ar/R signatures were used to predict permeability of plant AQP [12,13]. For instance,  
413 the F-H-T-R signature observed in the PgPIP (Table 2) which seems strictly conserved across  
414 PIP from different species has been associated with water and H<sub>2</sub>O<sub>2</sub> permeability  
415 [14,25,26,62]. The H-I-G-R signature observed in PgTIP2-1, PgTIP2-2 and PgTIP2-3 that is  
416 conserved in TIP2 from Arabidopsis, maize and rice supposedly allow permeability to water,  
417 NH<sub>3</sub>, urea and H<sub>2</sub>O<sub>2</sub> while the H-I-A-V signature observed in the unique PgTIP1 (PgTIP1-1) may  
418 allow NH<sub>3</sub>, urea and H<sub>2</sub>O<sub>2</sub> but restrict water permeation [63–65]. In PgNIP, the W-V-A-R  
419 signature have been associated with water, NH<sub>3</sub> and H<sub>2</sub>O<sub>2</sub> transports while the A-I/A-G/A-R  
420 signatures were restricted to water and NH<sub>3</sub>. Interestingly, PgNIP2-1 and PgNIP2-2 showed  
421 similar ar/R signature (G-S-G-R) than OsNIP2-1 that is permeable to silicon [18] and possess  
422 precise spacing of 108 amino-acids between the two NPA motifs supposed as essential for  
423 silicon permeability [66].

424 AQP in plants are expressed from root to leaf tissues, including inflorescence and  
425 pollen. Some PgPIP genes show tissue-specific expression with *PgPIP1-4* and *PgPIP2-3* being  
426 more specifically expressed in roots while *PgPIP2-1* is more specifically expressed in shoots  
427 and *PgPIP1-1* and *PgPIP1-3* are expressed in both tissues (Fig 5 and S7 Fig). It has been shown  
428 that PIP isoforms agglomerate as tetramers in the plasma membrane, each monomer forming  
429 functional units. Functional studies as well as protein-protein interactions studies suggest that  
430 PIP tetramers can be formed of heteromers of PIP1 and PIP2 with distinct functional  
431 properties depending on the isoform combination [67–70]. Based on PgPIP gene expression  
432 in pearl millet, PgPIP1-1, PgPIP1-3 and PgPIP1-4 might interact with PgPIP2-3 to form

433 heteromers in roots while PgPIP1-1, PgPIP1-3 and PgPIP2-1 might form different combinations  
434 of heteromers in shoots.

435 Intraspecific diversity in AQP isoform expression have been observed in rice and  
436 Arabidopsis [55,56,71,72]. In our study, diversity in expression pattern of PgAQP genes were  
437 observed between two pearl millet inbred lines with different water use strategies (Fig 5).  
438 IP4952 that showed significantly higher AQP contribution to Lpr as compared to IP17150 also  
439 showed significantly higher *PgPIP1-3* and *PgPIP1-4* gene expression. These results suggest that  
440 differences in expression of these AQP genes can reflect differences in AQP contribution to  
441 Lpr in pearl millet. These observations are in line with results from [34] showing that the  
442 expression of *VvPIP1-1* is associated to root hydraulics and response to water stress in two  
443 isohydric and anisohydric grapevine (*Vitis vinifera*) cultivars. Transpiration response to high  
444 VPD in four pearl millet recombinant inbred lines from a high resolution cross have been linked  
445 to PgPIP gene expression in roots [30]. These authors suggested that a down-regulation of  
446 PgPIP genes under high VPD induced reduction in transpiration and water savings. Our results  
447 showing reduced expression of *PgPIP1-3* and *PgPIP1-4* and AQP contribution to Lpr in IP17150,  
448 the line with higher water use efficiency, support the observations of [30]. Overall, expression  
449 profiling suggests that APQ may have different physiological functions across the pearl millet  
450 plant and contribute to its response to the environment. However, expression alone is  
451 certainly not fully representative of AQP function due to the many post-translational  
452 regulations affecting their activity [8]. Further investigations are needed to better understand  
453 the links between reduction in transpiration under high VPD, improved water use efficiency  
454 and AQP function in roots.

455 Pearl millet is a drought-adapted crop that will play a major role in the adaptation of  
456 agriculture to future climate in arid and semi-arid regions of Africa and India. Here, we provide

457 a comprehensive view of the AQP genes and isoforms present in pearl millet as well as their  
458 contribution in root radial water transport. We confirmed the presence of selectivity filters  
459 suggesting permeability to water in the PgAQP and point isoforms PgPIP1-3 and PgPIP1-4 as  
460 potential main contributors of root water transport in pearl millet. The function of these  
461 isoforms may be subjected to natural diversity and associated with plant water use strategies  
462 as suggested by their differential expression in pearl millet lines contrasting for Lpr and water  
463 use efficiency. Therefore, our study supports a potential role for AQP in regulating pearl millet  
464 hydraulics and potentially adaptation to challenging environmental conditions.

465

## 466 **Declaration of competing interest**

467 No conflicts of interest declared

468

## 469 **Acknowledgments**

470 The authors are grateful to Dr Prakash Gangashetty (ICRISAT, Niger) for providing seeds of the  
471 inbred lines used in this study and Dr Kwanho Jeong (IRD, France) for his kind support in the  
472 preparation of this manuscript. The authors acknowledge the IRD iTrop HPC (South Green  
473 Platform) at IRD Montpellier for providing HPC resources that have contributed to the  
474 research results reported in this paper (<https://bioinfo.ird.fr/>- <http://www.southgreen.fr>).

475

## 476 **Funding**

477 This work was supported by the CGIAR Research Programme on Grain Legumes and Dryland  
478 Cereals (GLDC). PA was supported by the Cultivar program from the Agropolis Foundation as

479 part of the "Investissement d'Avenir" (ANR-I0-LABX-0001-0I) under the frame of I-SITE MUSE  
480 (ANR-16-IDEX-0006). The French Agence Nationale de la Recherche supports the post-  
481 doctoral fellowship of CFC (ANR Grant RootAdapt n°ANR17-CE20-0022-01 to LL).

482

## 483 **Author contributions**

484 AG, CTD and LL designed the study. AG, PA, CTD, CFC and CM performed the experiments. AG,  
485 CTD, PA, CFC, CM, PG, VV, YV and LL analyzed the data and discussed the results. AG and LL  
486 wrote the paper. All authors read and approved the manuscript.

487

## 488 References

- 489 1. Steudle E. The cohesion-tension mechanism and the acquisition of water by plant  
490 roots. *Annu Rev Plant Physiol Plant Mol Biol.* 2001;52: 847–875.  
491 doi:10.1146/annurev.arplant.52.1.847
- 492 2. Geldner N. The Endodermis. *Annu Rev Plant Biol.* 2013;64: 531–558.  
493 doi:10.1146/annurev-arplant-050312-120050
- 494 3. Wang P, Calvo-Polanco M, Reyt G, Barberon M, Champeyroux C, Santoni V, et al.  
495 Surveillance of cell wall diffusion barrier integrity modulates water and solute  
496 transport in plants. *Sci Rep.* 2019;9: 1–11. doi:10.1038/s41598-019-40588-5
- 497 4. Abascal F, Irisarri I, Zardoya R. Diversity and evolution of membrane intrinsic proteins.  
498 *Biochim Biophys Acta.* 2014;1840: 1468–1481. doi:10.1016/j.bbagen.2013.12.001
- 499 5. Verma RK, Gupta AB, Sankararamkrishnan R. Major intrinsic protein superfamily:  
500 Channels with unique structural features and diverse selectivity filters. *Methods*  
501 *Enzymol.* 1st ed. 2015;557: 485–520. doi:10.1016/bs.mie.2014.12.006
- 502 6. Froger A, Tallur B, Thomas D, Delamarche C. Prediction of functional residues in water  
503 channels and related proteins. *Protein Sci.* 1998;7: 1458–1468.  
504 doi:10.1002/pro.5560070623
- 505 7. Hub JS, De Groot BL. Mechanism of selectivity in aquaporins and aquaglyceroporins.  
506 *Proc Natl Acad Sci U S A.* 2008;105: 1198–1203. doi:10.1073/pnas.0707662104
- 507 8. Maurel C, Boursiac Y, Luu D-T, Santoni V, Shahzad Z, Verdoucq L. Aquaporins in plants.  
508 *Physiol Rev.* 2015;95: 1321–58. doi:10.1152/physrev.00008.2015
- 509 9. Ishikawa F, Suga S, Uemura T, Sato MH, Maeshima M. Novel type aquaporin SIPs are  
510 mainly localized to the ER membrane and show cell-specific expression in *Arabidopsis*  
511 *thaliana*. *FEBS Lett.* 2005;579: 5814–5820. doi:10.1016/j.febslet.2005.09.076
- 512 10. Wudick MM, Luu DT, Maurel C. A look inside: Localization patterns and functions of  
513 intracellular plant aquaporins. *New Phytol.* 2009;184: 289–302. doi:10.1111/j.1469-  
514 8137.2009.02985.x
- 515 11. Bienert GP, Bienert MD, Jahn TP, Boutry M, Chaumont F. *Solanaceae* XIPs are plasma  
516 membrane aquaporins that facilitate the transport of many uncharged substrates.  
517 *Plant J.* 2011;66: 306–317. doi:10.1111/j.1365-313X.2011.04496.x
- 518 12. Bansal A, Sankararamkrishnan R. Homology modeling of major intrinsic proteins in  
519 rice, maize and Arabidopsis: Comparative analysis of transmembrane helix association  
520 and aromatic/arginine selectivity filters. *BMC Struct Biol.* 2007;7: 1–17.  
521 doi:10.1186/1472-6807-7-27
- 522 13. Wallace IS, Roberts DM. Homology modeling of representative subfamilies of  
523 Arabidopsis major intrinsic proteins. Classification based on the aromatic/arginine  
524 selectivity filter. *Plant Physiol.* 2004;135: 1059–1068. doi:10.1104/pp.103.033415
- 525 14. Rodrigues O, Reshetnyak G, Grondin A, Saijo Y, Leonhardt N, Maurel C, et al.  
526 Aquaporins facilitate hydrogen peroxide entry into guard cells to mediate ABA- and  
527 pathogen-triggered stomatal closure. *Proc Natl Acad Sci U S A.* 2017;114.  
528 doi:10.1073/pnas.1704754114
- 529 15. Uehlein N, Lovisolo C, Siefritz F, Kaldenhoff R. The tobacco aquaporin NtAQP1 is a  
530 membrane CO<sub>2</sub> pore with physiological functions. *Nature.* 2003;425: 734–737.  
531 doi:10.1038/nature02027
- 532 16. Loqué D, Ludewig U, Yuan L, Von Wirén N. Tonoplast intrinsic proteins AtTIP2;1 and  
533 AtTIP2;3 facilitate NH<sub>3</sub> transport into the vacuole. *Plant Physiol.* 2005;137: 671–680.



- 534 doi:10.1104/pp.104.051268
- 535 17. Biela A, Grote K, Otto B, Hoth S, Hedrich R, Kaldenhoff R. The *Nicotiana tabacum*  
536 plasma membrane aquaporin NtAQP1 is mercury-insensitive and permeable for  
537 glycerol. *Plant J.* 1999;18: 565–570. doi:10.1046/j.1365-313X.1999.00474.x
- 538 18. Ma FJ, Kazunori T, Naoki Y, Namiki M, Saeko K, Maki K, et al. A silicon transporter in  
539 rice. *Nature.* 2006;440: 688–691. doi:10.1038/nature04590
- 540 19. Chaumont F, Barrieu F, Wojcik E, Chrispeels MJ, Jung R. Aquaporins constitute a large  
541 and highly divergent protein family in maize. *Plant Physiol.* 2001;125: 1206–1215.  
542 doi:10.1104/pp.125.3.1206
- 543 20. Azad AK, Ahmed J, Md Asraful A, Md Mahbub H, Ishikawa T, Sawa Y, et al. Genome-  
544 wide characterization of major intrinsic proteins in four grass plants and their non-  
545 aqua transport selectivity profiles with comparative perspective. *PLoS One.* 2016;11:  
546 e0157735. doi:10.1371/journal.pone.0157735
- 547 21. Reddy PS, Rao TSRB, Sharma KK, Vadez V. Genome-wide identification and  
548 characterization of the aquaporin gene family in *Sorghum bicolor* (L.). *Plant Gene.*  
549 2015;1: 18–28. doi:10.1016/j.plgene.2014.12.002
- 550 22. Sakurai J, Ishikawa F, Yamaguchi T, Uemura M, Maeshima M. Identification of 33 rice  
551 aquaporin genes and analysis of their expression and function. *Plant Cell Physiol.*  
552 2005;46: 1568–77. doi:10.1093/pcp/pci172
- 553 23. Guerriero G, Deshmukh R, Sonah H, Sergeant K, Hausman JF, Lentzen E, et al.  
554 Identification of the aquaporin gene family in *Cannabis sativa* and evidence for the  
555 accumulation of silicon in its tissues. *Plant Sci.* 2019;287: 110167.  
556 doi:10.1016/j.plantsci.2019.110167
- 557 24. Reuscher S, Akiyama M, Mori C, Aoki K, Shibata D, Shiratake K. Genome-wide  
558 identification and expression analysis of aquaporins in tomato. *PLoS One.* 2013;8:  
559 e79052. doi:10.1371/journal.pone.0079052
- 560 25. Javot H, Lauvergeat V, Santoni V, Martin-Laurent F, Güçlü J, Vinh J, et al. Role of a  
561 single aquaporin isoform in root water uptake. *Plant Cell.* 2003;15: 509–522.  
562 doi:10.1105/tpc.008888
- 563 26. Postaire O, Tournaire-Roux C, Grondin A, Boursiac Y, Morillon R, Schäffner AR, et al. A  
564 PIP1 aquaporin contributes to hydrostatic pressure-induced water transport in both  
565 the root and rosette of *Arabidopsis*. *Plant Physiol.* 2010;152: 1418–1430.  
566 doi:10.1104/pp.109.145326
- 567 27. Vadez V. Root hydraulics: The forgotten side of roots in drought adaptation. *F Crop*  
568 *Res.* 2014;165: 15–24. doi:10.1016/j.fcr.2014.03.017
- 569 28. Moshelion M, Halperin O, Wallach R, Oren R, Way DA. Role of aquaporins in  
570 determining transpiration and photosynthesis in water-stressed plants: Crop water-  
571 use efficiency, growth and yield. *Plant, Cell Environ.* 2015;38: 1785–1793.  
572 doi:10.1111/pce.12410
- 573 29. Shekoofa A, Sinclair T. Aquaporin activity to improve crop drought tolerance. *Cells.*  
574 2018;7: 123. doi:10.3390/cells7090123
- 575 30. Reddy PS, Tharanya M, Sivasakthi K, Srikanth M, Hash CT, Kholova J, et al. Molecular  
576 cloning and expression analysis of aquaporin genes in pearl millet [*Pennisetum*  
577 *glaucum* (L) R. Br.] genotypes contrasting in their transpiration response to high  
578 vapour pressure deficits. *Plant Sci.* 2017;265: 167–176.  
579 doi:10.1016/j.plantsci.2017.10.005
- 580 31. Zhang C, Postma JA, York LM, Lynch JP. Root foraging elicits niche complementarity-

- 581 dependent yield advantage in the ancient ‘ three sisters ’ (maize/bean/squash)  
582 polyculture. *Ann Bot.* 2014;114: 1719–1733. doi:10.1093/aob/mcu191
- 583 32. Tharanya M, Kholova J, Sivasakthi K, Seghal D, Hash CT, Raj B, et al. Quantitative trait  
584 loci (QTLs) for water use and crop production traits co-locate with major QTL for  
585 tolerance to water deficit in a fine-mapping population of pearl millet (*Pennisetum*  
586 *glaucum* L. R.Br.). *Theor Appl Genet.* 2018;131: 1509–1529. doi:10.1007/s00122-018-  
587 3094-6
- 588 33. Sadok W, Sinclair TR. Transpiration response of “slow-wilting” and commercial  
589 soybean (*Glycine max* (L.) Merr.) genotypes to three aquaporin inhibitors. *J Exp Bot.*  
590 2010;61: 821–829. doi:10.1093/jxb/erp350
- 591 34. Vandeleur RK, Mayo G, Shelden MC, Gilliam M, Kaiser BN, Tyerman SD. The role of  
592 plasma membrane intrinsic protein aquaporins in water transport through roots:  
593 Diurnal and drought stress responses reveal different strategies between isohydric  
594 and anisohydric cultivars of grapevine. *Plant Physiol.* 2009;149: 445–460.  
595 doi:10.1104/pp.108.128645
- 596 35. Sakurai-Ishikawa J, Murai-Hatano M, Hayashi H, Ahamed A, Fukushi K, Matsumoto T,  
597 et al. Transpiration from shoots triggers diurnal changes in root aquaporin expression.  
598 *Plant, Cell Environ.* 2011;34: 1150–1163. doi:10.1111/j.1365-3040.2011.02313.x
- 599 36. Sade N, Vinocur BJ, Diber A, Shatil A, Ronen G, Nissan H, et al. Improving plant stress  
600 tolerance and yield production: Is the tonoplast aquaporin SiTIP2;2 a key to isohydric  
601 to anisohydric conversion? *New Phytol.* 2009;181: 651–661. doi:10.1111/j.1469-  
602 8137.2008.02689.x
- 603 37. Kholová J, Hash CT, Kakkera A, Koová M, Vadez V. Constitutive water-conserving  
604 mechanisms are correlated with the terminal drought tolerance of pearl millet  
605 [*Pennisetum glaucum* (L.) R. Br.]. *J Exp Bot.* 2010;61: 369–377. doi:10.1093/jxb/erp314
- 606 38. Kholová J, Nepolean T, Tom Hash C, Supriya A, Rajaram V, Senthilvel S, et al. Water  
607 saving traits co-map with a major terminal drought tolerance quantitative trait locus  
608 in pearl millet [*Pennisetum glaucum* (L.) R. Br.]. *Mol Breed.* 2012;30: 1337–1353.  
609 doi:10.1007/s11032-012-9720-0
- 610 39. Vadez V, Kholova J, Zaman-Allah M, Belko N. Water: The most important “molecular”  
611 component of water stress tolerance research. *Funct Plant Biol.* 2013;40: 1310–1322.  
612 doi:10.1071/FP13149
- 613 40. Debieu M, Kanfany G, Laplaze L. Pearl Millet Genome: Lessons from a Tough Crop.  
614 *Trends Plant Sci.* 2017;22: 911–913. doi:10.1016/j.tplants.2017.09.006
- 615 41. Sultan B, Defrance D, Iizumi T. Evidence of crop production losses in West Africa due  
616 to historical global warming in two crop models. *Sci Rep.* 2019;9: 1–15.  
617 doi:10.1038/s41598-019-49167-0
- 618 42. Debieu M, Sine B, Passot S, Grondin A, Akata E, Gangashetty P, et al. Response to  
619 early drought stress and identification of QTLs controlling biomass production under  
620 drought in pearl millet. *PLoS One.* 2018;13: 1–19. doi:10.1371/journal.pone.0201635
- 621 43. Varshney RK, Shi C, Thudi M, Mariac C, Wallace J, Qi P, et al. Pearl millet genome  
622 sequence provides a resource to improve agronomic traits in arid environments. *Nat*  
623 *Biotechnol.* 2017;35: 969–976. doi:10.1038/nbt.3943
- 624 44. Vadez V, Deshpande SP, Kholova J, Hammer GL, Borrell AK, Talwar HS, et al. Stay-  
625 green quantitative trait loci’s effects on water extraction, transpiration efficiency and  
626 seed yield depend on recipient parent background. *Funct Plant Biol.* 2011;131: 1509–  
627 1529. doi:10.1071/FP11073

- 628 45. Vadez V, Kholova J, Medina S, Kakker A, Anderberg H. Transpiration efficiency: New  
629 insights into an old story. *J Exp Bot.* 2014;65: 6141–6153. doi:10.1093/jxb/eru040
- 630 46. Hoagland DR, Arnon DI. The water-culture method for growing plants without soil.  
631 *Calif Agr Expt Sta Circ.* 1950;347: 1–32. doi:citeulike-article-id:9455435
- 632 47. Boursiac Y, Chen S, Luu D-T, Sorieul M, van den Dries N, Maurel C. Early effects of  
633 salinity on water transport in Arabidopsis roots. Molecular and cellular features of  
634 aquaporin expression. *Plant Physiol.* 2005;139: 790–805. doi:10.1104/pp.105.065029
- 635 48. Henry A, Cal AJ, Batoto TC, Torres RO, Serraj R. Root attributes affecting water uptake  
636 of rice (*Oryza sativa*) under drought. *J Exp Bot.* 2012;63: 4751–4763.  
637 doi:10.1093/jxb/ers150
- 638 49. Sarah G, Homa F, Pointet S, Contreras S, Sabot F, Nabholz B, et al. A large set of 26  
639 new reference transcriptomes dedicated to comparative population genomics in  
640 crops and wild relatives. *Mol Ecol Resour.* 2017;17: 565–580. doi:10.1111/1755-  
641 0998.12587
- 642 50. Milne I, Stephen G, Bayer M, Cock PJA, Pritchard L, Cardle L, et al. Using tablet for  
643 visual exploration of second-generation sequencing data. *Brief Bioinform.* 2013;14:  
644 193–202. doi:10.1093/bib/bbs012
- 645 51. Hu B, Jin J, Guo AY, Zhang H, Luo J, Gao G. GSDS 2.0: An upgraded gene feature  
646 visualization server. *Bioinformatics.* 2015;15: 1296–1297.  
647 doi:10.1093/bioinformatics/btu817
- 648 52. Kelley LA, Mezulis S, Yates CM, Wass MN, Sternberg MJE. The Phyre2 web portal for  
649 protein modeling, prediction and analysis. *Nat Protoc.* 2015;10: 845.  
650 doi:10.1038/nprot.2015.053
- 651 53. Kumar S, Stecher G, Tamura K. MEGA7: Molecular Evolutionary Genetics Analysis  
652 Version 7.0 for bigger datasets. *Mol Biol Evol.* 2016;33: 1870–1874.  
653 doi:10.1093/molbev/msw054
- 654 54. Javot H, Maurel C. The role of aquaporins in root water uptake. *Ann Bot.* 2002;90:  
655 301–313. doi:10.1093/aob/mcf199
- 656 55. Sutka M, Li G, Boudet J, Boursiac Y, Doumas P, Maurel C. Natural variation of root  
657 hydraulics in Arabidopsis grown in normal and salt-stressed conditions. *Plant Physiol.*  
658 2011;155: 1264–1276. doi:10.1104/pp.110.163113
- 659 56. Grondin A, Mauleon R, Vadez V, Henry A. Root aquaporins contribute to whole plant  
660 water fluxes under drought stress in rice (*Oryza sativa* L.). *Plant, Cell Environ.* 2016;39:  
661 doi:10.1111/pce.12616
- 662 57. Johanson U, Karlsson M, Johansson I, Gustavsson S, Sjövall S, Fraysse L, et al. The  
663 complete set of genes encoding major intrinsic proteins in Arabidopsis provides a  
664 framework for a new nomenclature for major intrinsic proteins in plants. *Plant*  
665 *Physiol.* 2001;126: 1358–1369. doi:10.1104/pp.126.4.1358
- 666 58. Tattini L, D’Aurizio R, Magi A. Detection of genomic structural variants from next-  
667 generation sequencing data. *Front Bioeng Biotechnol.* 2015;25: 3–92.  
668 doi:10.3389/fbioe.2015.00092
- 669 59. Chakrabarti N, Tajkhorshid E, Roux B, Pomès R. Molecular basis of proton blockage in  
670 aquaporins. *Structure.* 2004;12: 65–74. doi:10.1016/j.str.2003.11.017
- 671 60. Törnroth-Horsefield S, Wang Y, Hedfalk K, Johanson U, Karlsson M, Tajkhorshid E, et  
672 al. Structural mechanism of plant aquaporin gating. *Nature.* 2006;439: 688–694.  
673 doi:10.1038/nature04316
- 674 61. Mori IC, Rhee J, Shibasaka M, Sasano S, Kaneko T, Horie T, et al. CO<sub>2</sub> transport by PIP2

- 675 aquaporins of barley. *Plant Cell Physiol.* 2014;55: 251–257. doi:10.1093/pcp/pcu003  
676 62. Tournaire-Roux C, Sutka M, Javot H, Gout E, Gerbeau P, Luu D-T, et al. Cytosolic pH  
677 regulates root water transport during anoxic stress through gating of aquaporins.  
678 *Nature.* 2003;425: 393–397. doi:10.1038/nature01853  
679 63. Maurel C, Reizer J, Schroeder JI, Chrispeels MJ. The vacuolar membrane protein  
680 gamma-TIP creates water specific channels in *Xenopus oocytes*. *EMBO J.* 1993;12:  
681 2241–2247. doi:10.1002/j.1460-2075.1993.tb05877.x  
682 64. Dynowski M, Schaaf G, Loque D, Moran O, Ludewig U. Plant plasma membrane water  
683 channels conduct the signalling molecule H<sub>2</sub>O<sub>2</sub>. *Biochem J.* 2008;414: 53–61.  
684 doi:10.1042/BJ20080287  
685 65. Jahn TP, Møller ALB, Zeuthen T, Holm LM, Klærke DA, Mohsin B, et al. Aquaporin  
686 homologues in plants and mammals transport ammonia. *FEBS Lett.* 2004;574: 31–36.  
687 doi:10.1016/j.febslet.2004.08.004  
688 66. Deshmukh RK, Vivancos J, Ramakrishnan G, Guérin V, Carpentier G, Sonah H, et al. A  
689 precise spacing between the NPA domains of aquaporins is essential for silicon  
690 permeability in plants. *Plant J.* 2015;83: 489–500. doi:10.1111/tpj.12904  
691 67. Fetter K, Van Wilder V, Moshelion M, Chaumont F. Interactions between plasma  
692 membrane aquaporins modulate their water channel activity. *Plant Cell.* 2004;16:  
693 215–228. doi:10.1105/tpc.017194  
694 68. Zelazny E, Borst JW, Muylaert M, Batoko H, Hemminga MA, Chaumont F. FRET  
695 imaging in living maize cells reveals that plasma membrane aquaporins interact to  
696 regulate their subcellular localization. *Proc Natl Acad Sci U S A.* 2007;104: 12359–  
697 12364. doi:10.1073/pnas.0701180104  
698 69. Yaneff A, Sigaut L, Marquez M, Alleva K, Pietrasanta LI, Amodeo G. Heteromerization  
699 of PIP aquaporins affects their intrinsic permeability. *Proc Natl Acad Sci U S A.*  
700 2014;111: 231–236. doi:10.1073/pnas.1316537111  
701 70. Bellati J, Alleva K, Soto G, Vitali V, Jozefkowicz C, Amodeo G. Intracellular pH sensing is  
702 altered by plasma membrane PIP aquaporin co-expression. *Plant Mol Biol.* 2010;74:  
703 105–118. doi:10.1007/s11103-010-9658-8  
704 71. Lian H-L, Yu X, Lane D, Sun W-N, Tang Z-C, Su W-A. Upland rice and lowland rice  
705 exhibited different PIP expression under water deficit and ABA treatment. *Cell Res.*  
706 2006;16: 651–60. doi:10.1038/sj.cr.7310068  
707 72. Alexandersson E, Danielson JÅH, Råde J, Moparthi VK, Fontes M, Kjellbom P, et al.  
708 Transcriptional regulation of aquaporins in accessions of *Arabidopsis* in response to  
709 drought stress. *Plant J.* 2010;61: 650–660. doi:10.1111/j.1365-313X.2009.04087.x  
710  
711

## 712 **Supporting information**

713 **S1 Table. Root hydraulic conductivity (Lpr) and aquaporin (AQP) contribution in IP4952 and**  
714 **IP17150.**

715 **S2 Table. High scoring pairs with highest bit score at the fifty hot-spots.**

716 **S3 Table. Functional annotation of the pearl millet genomic regions corresponding to**  
717 **hotspots of High Scoring Pairs.**

718 **S4 Table. Primers used for genomic DNA (gDNA) or complementary DNA (cDNA)**  
719 **amplification of aquaporins showing missing sequence.**

720 **S5 Table. Primers used for quantitative RT-PCR.**

721 **S6 Table. Analysis of aquaporin conserved domains in pearl millet.**

722 **S7 Table. Transmembrane domain analysis of aquaporins in pearl millet.**

723 **S1 Fig. Reversion of azide-induced root hydraulic conductivity inhibition.**

724 **S2 Fig. Structure of pearl millet aquaporins genes.**

725 **S3 Fig. Conserved domains and membrane topology of the TIP isoforms from pearl millet.**

726 **S4 Fig. Conserved domains and membrane topology of the NIP isoforms from pearl millet.**

727 **S5 Fig. Conserved domains and membrane topology of the SIP isoforms from pearl millet.**

728 **S6 Fig. Cavity features of PgPIP isoforms.**

729 **S7 Fig. Expression pattern of PgPIP isoforms in shoots of pearl millet.**

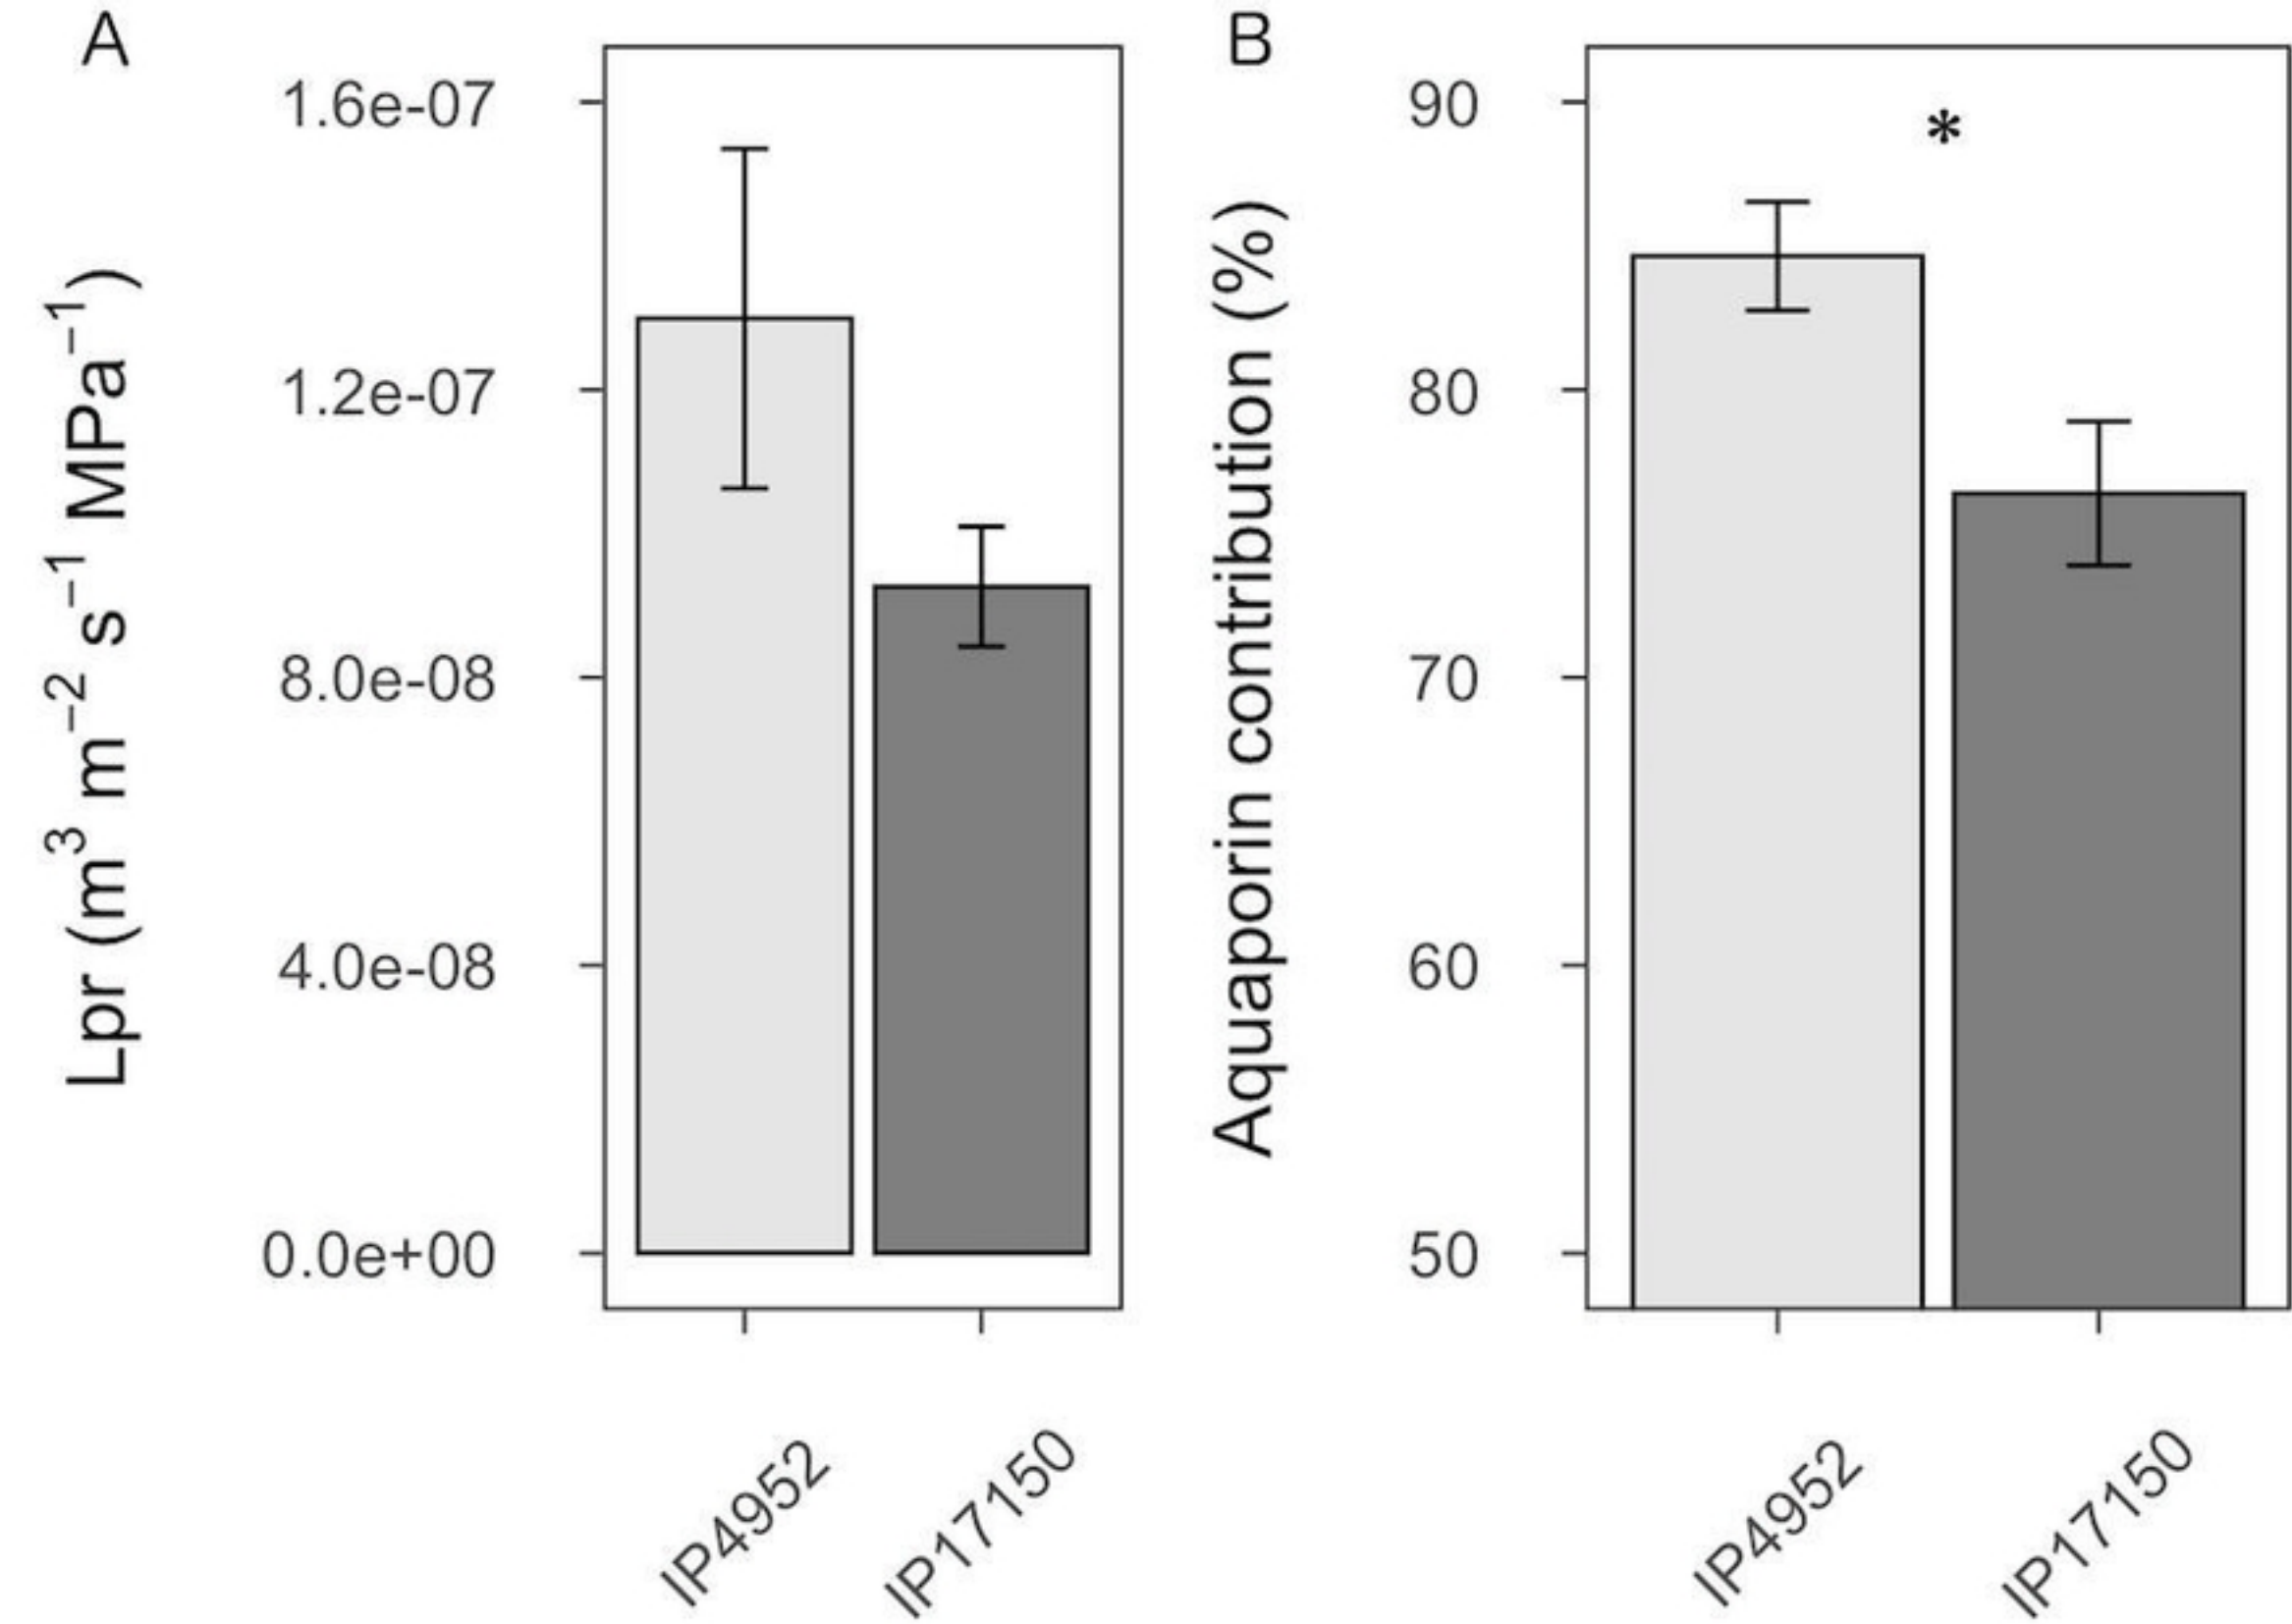

bioRxiv preprint doi: <https://doi.org/10.1101/2020.05.094094>; this version posted May 14, 2020. The copyright holder for this preprint (which was not certified by peer review) is the author/funder, who has granted bioRxiv a license to display the preprint in perpetuity. It is made available under aCC-BY 4.0 International license.

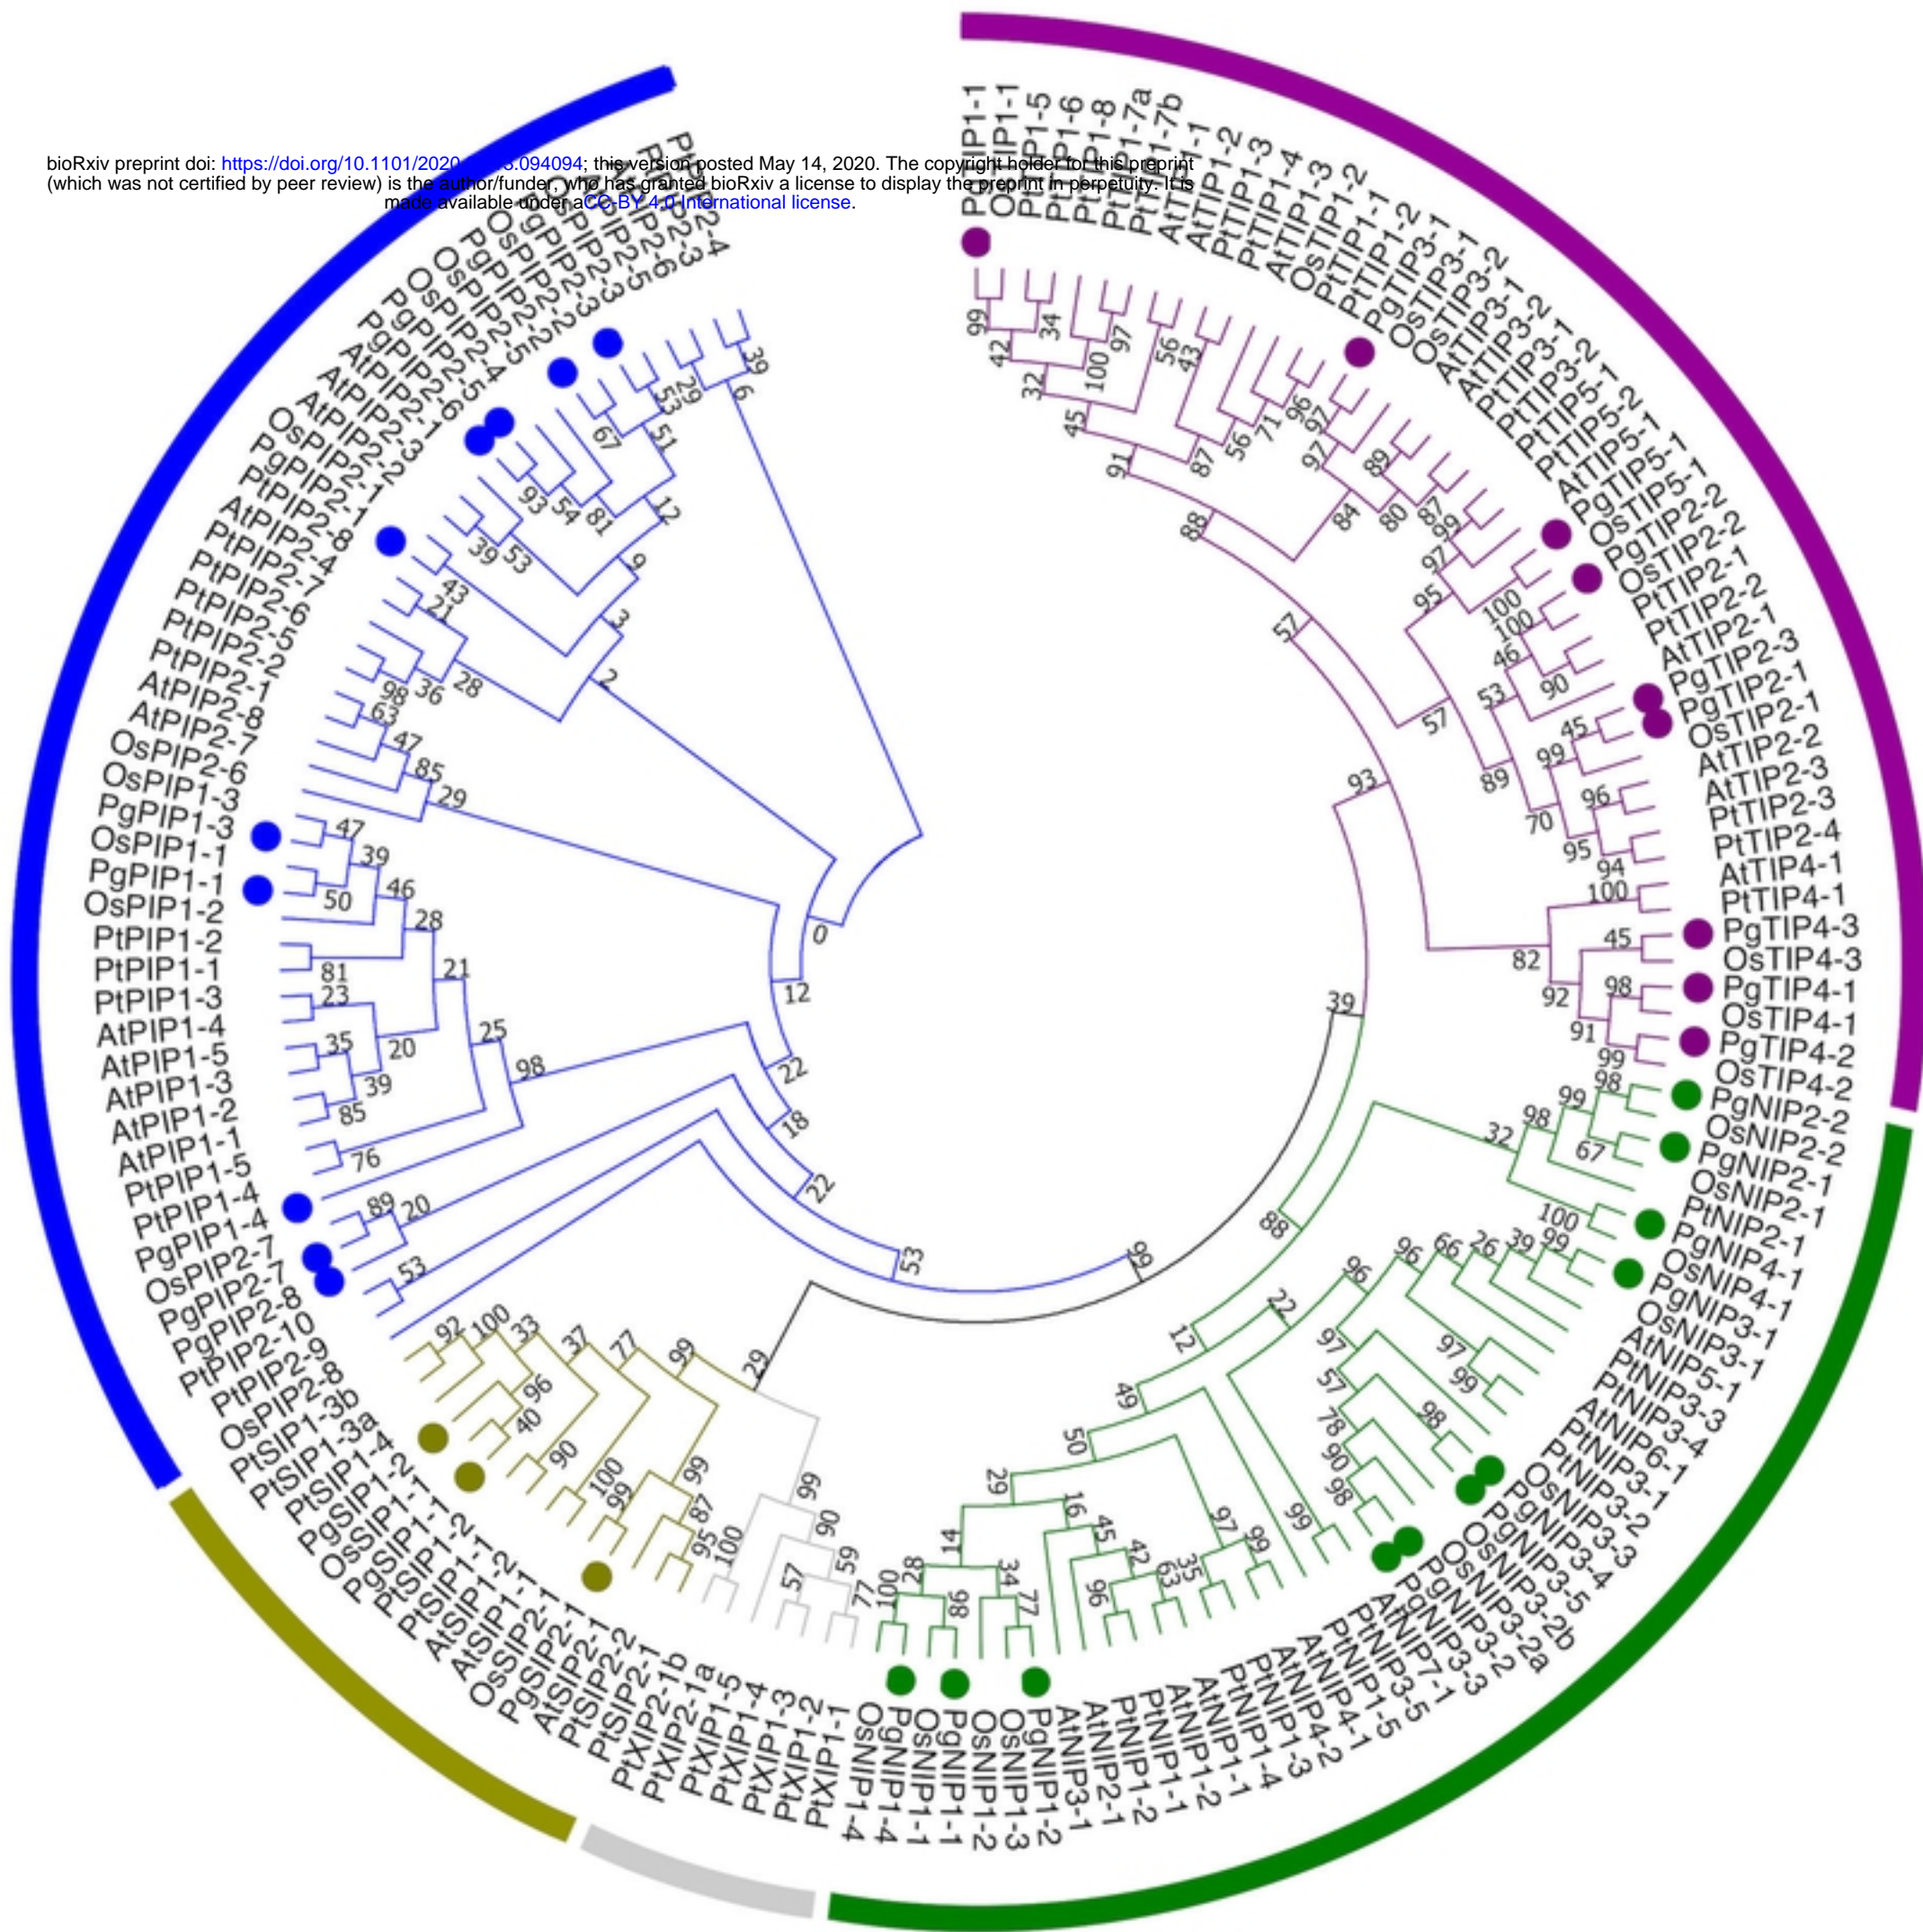

Figure

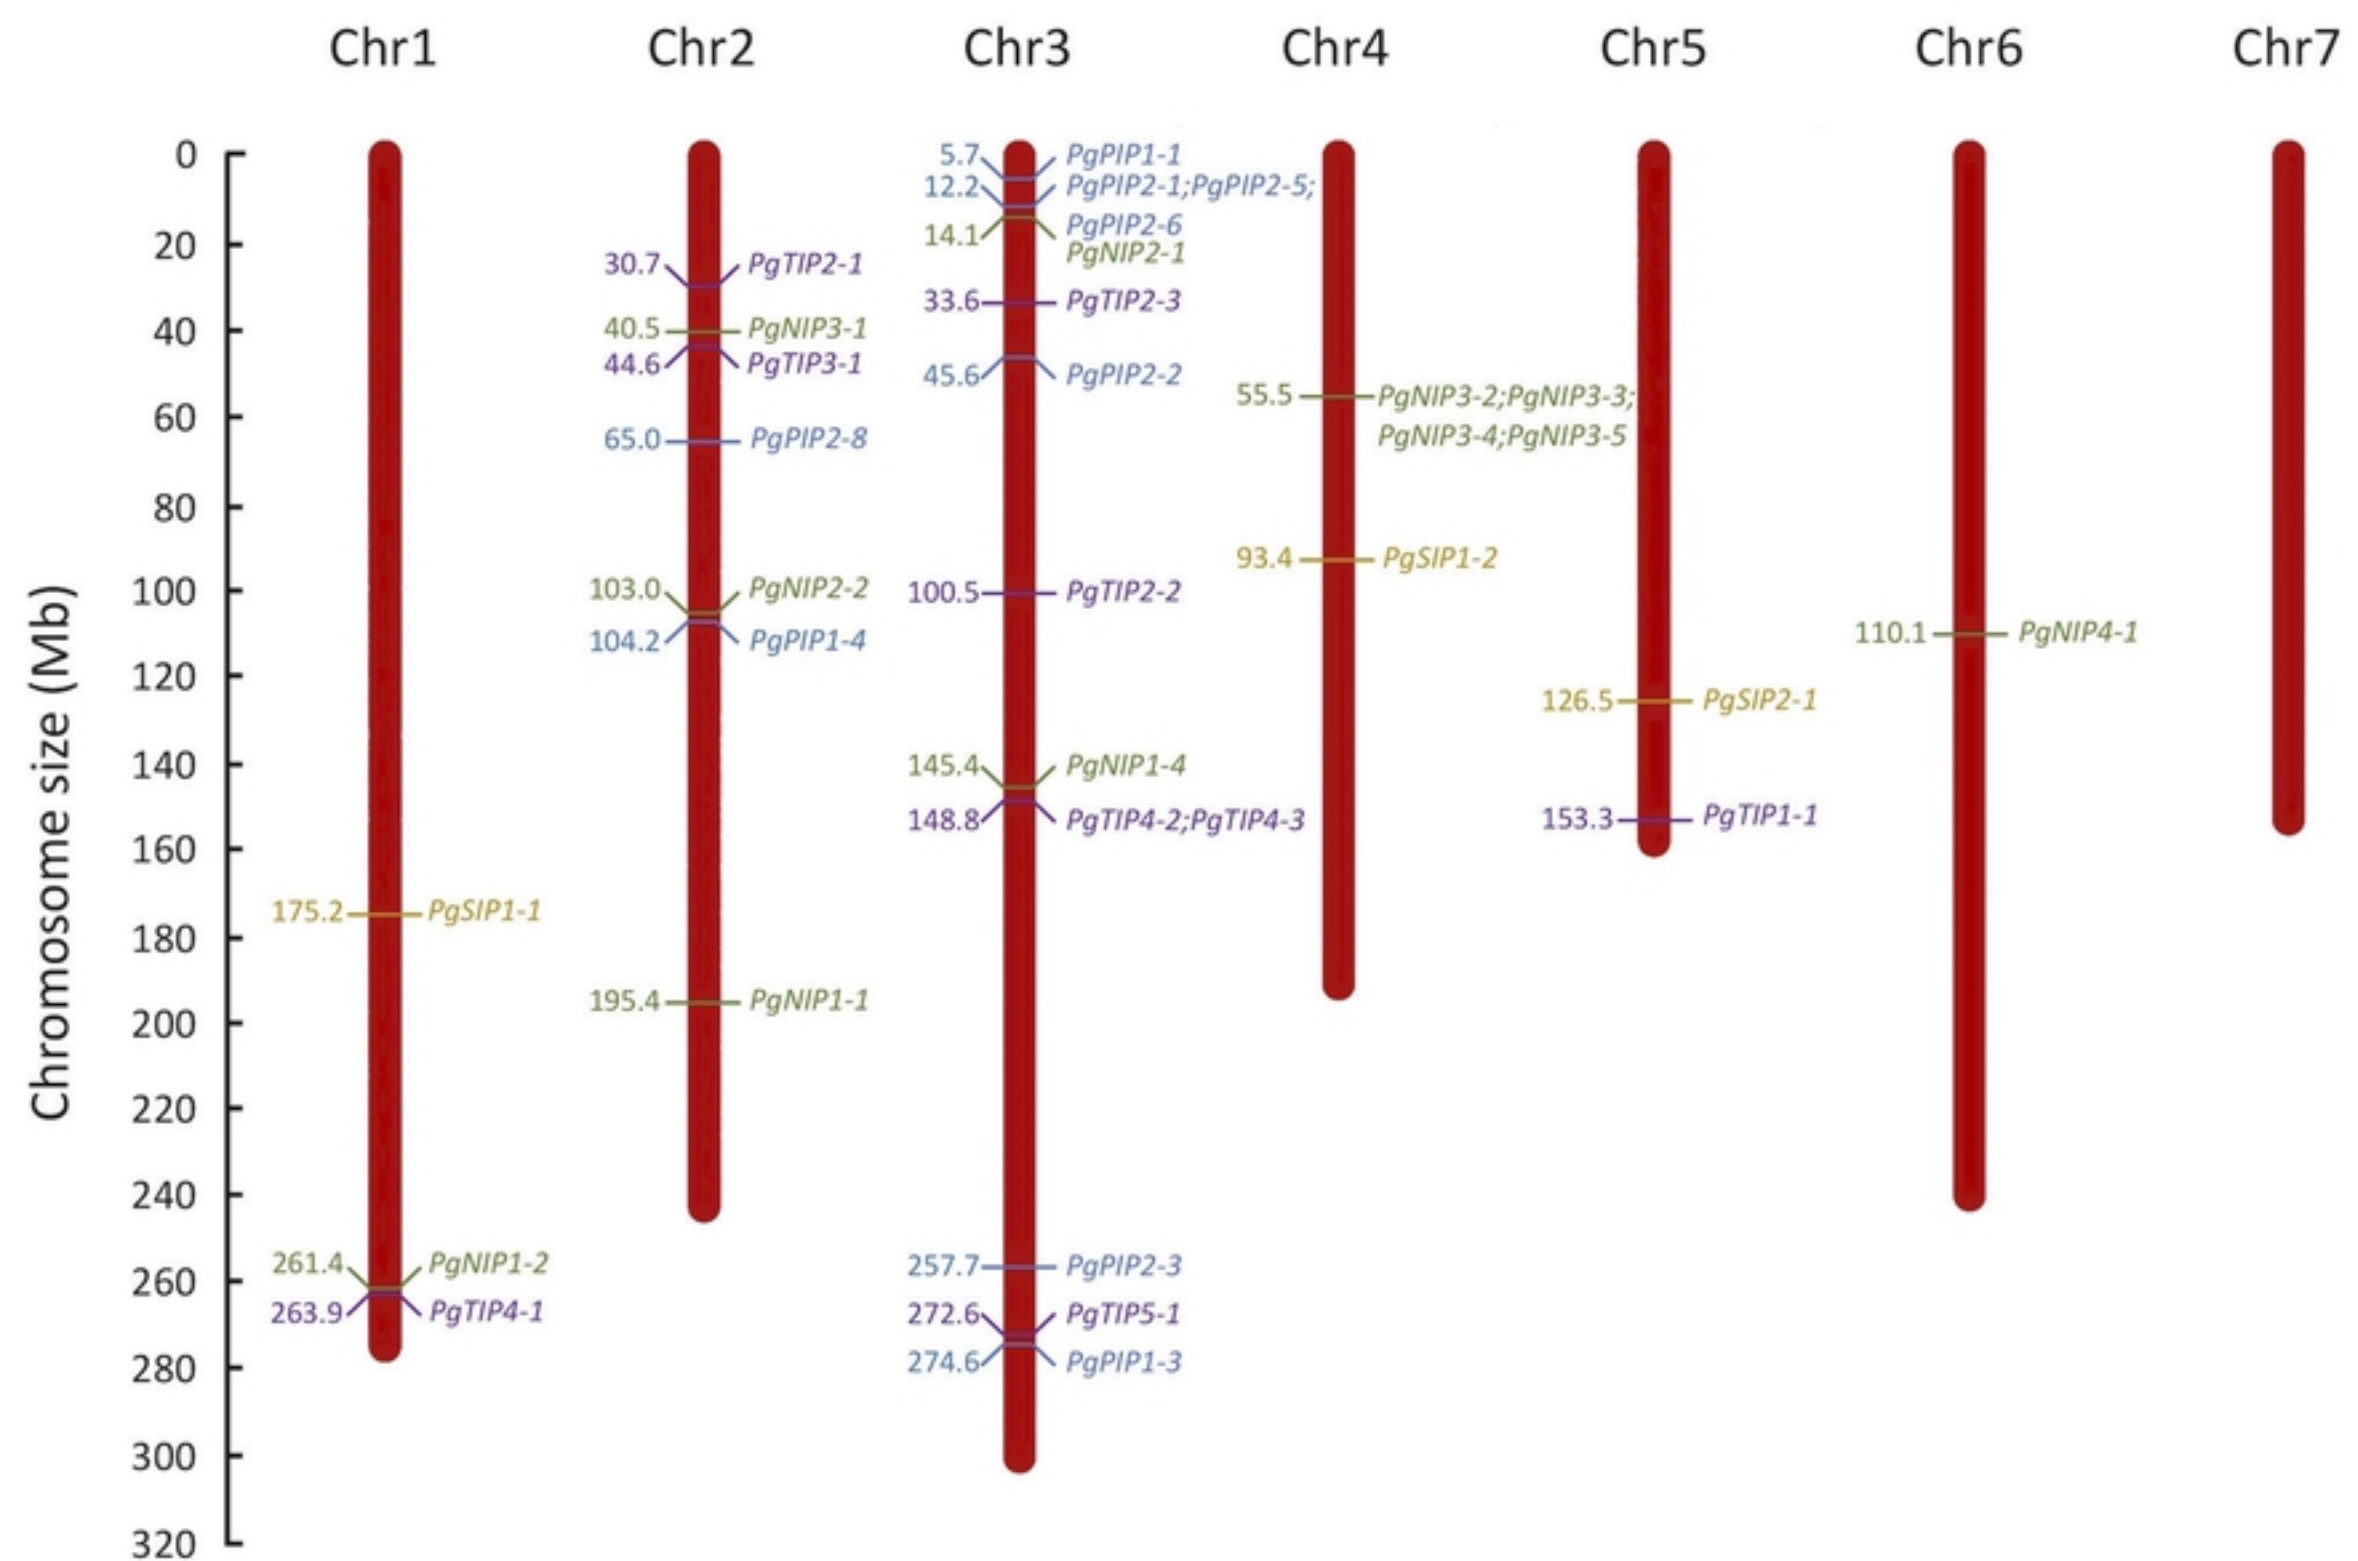

Figure



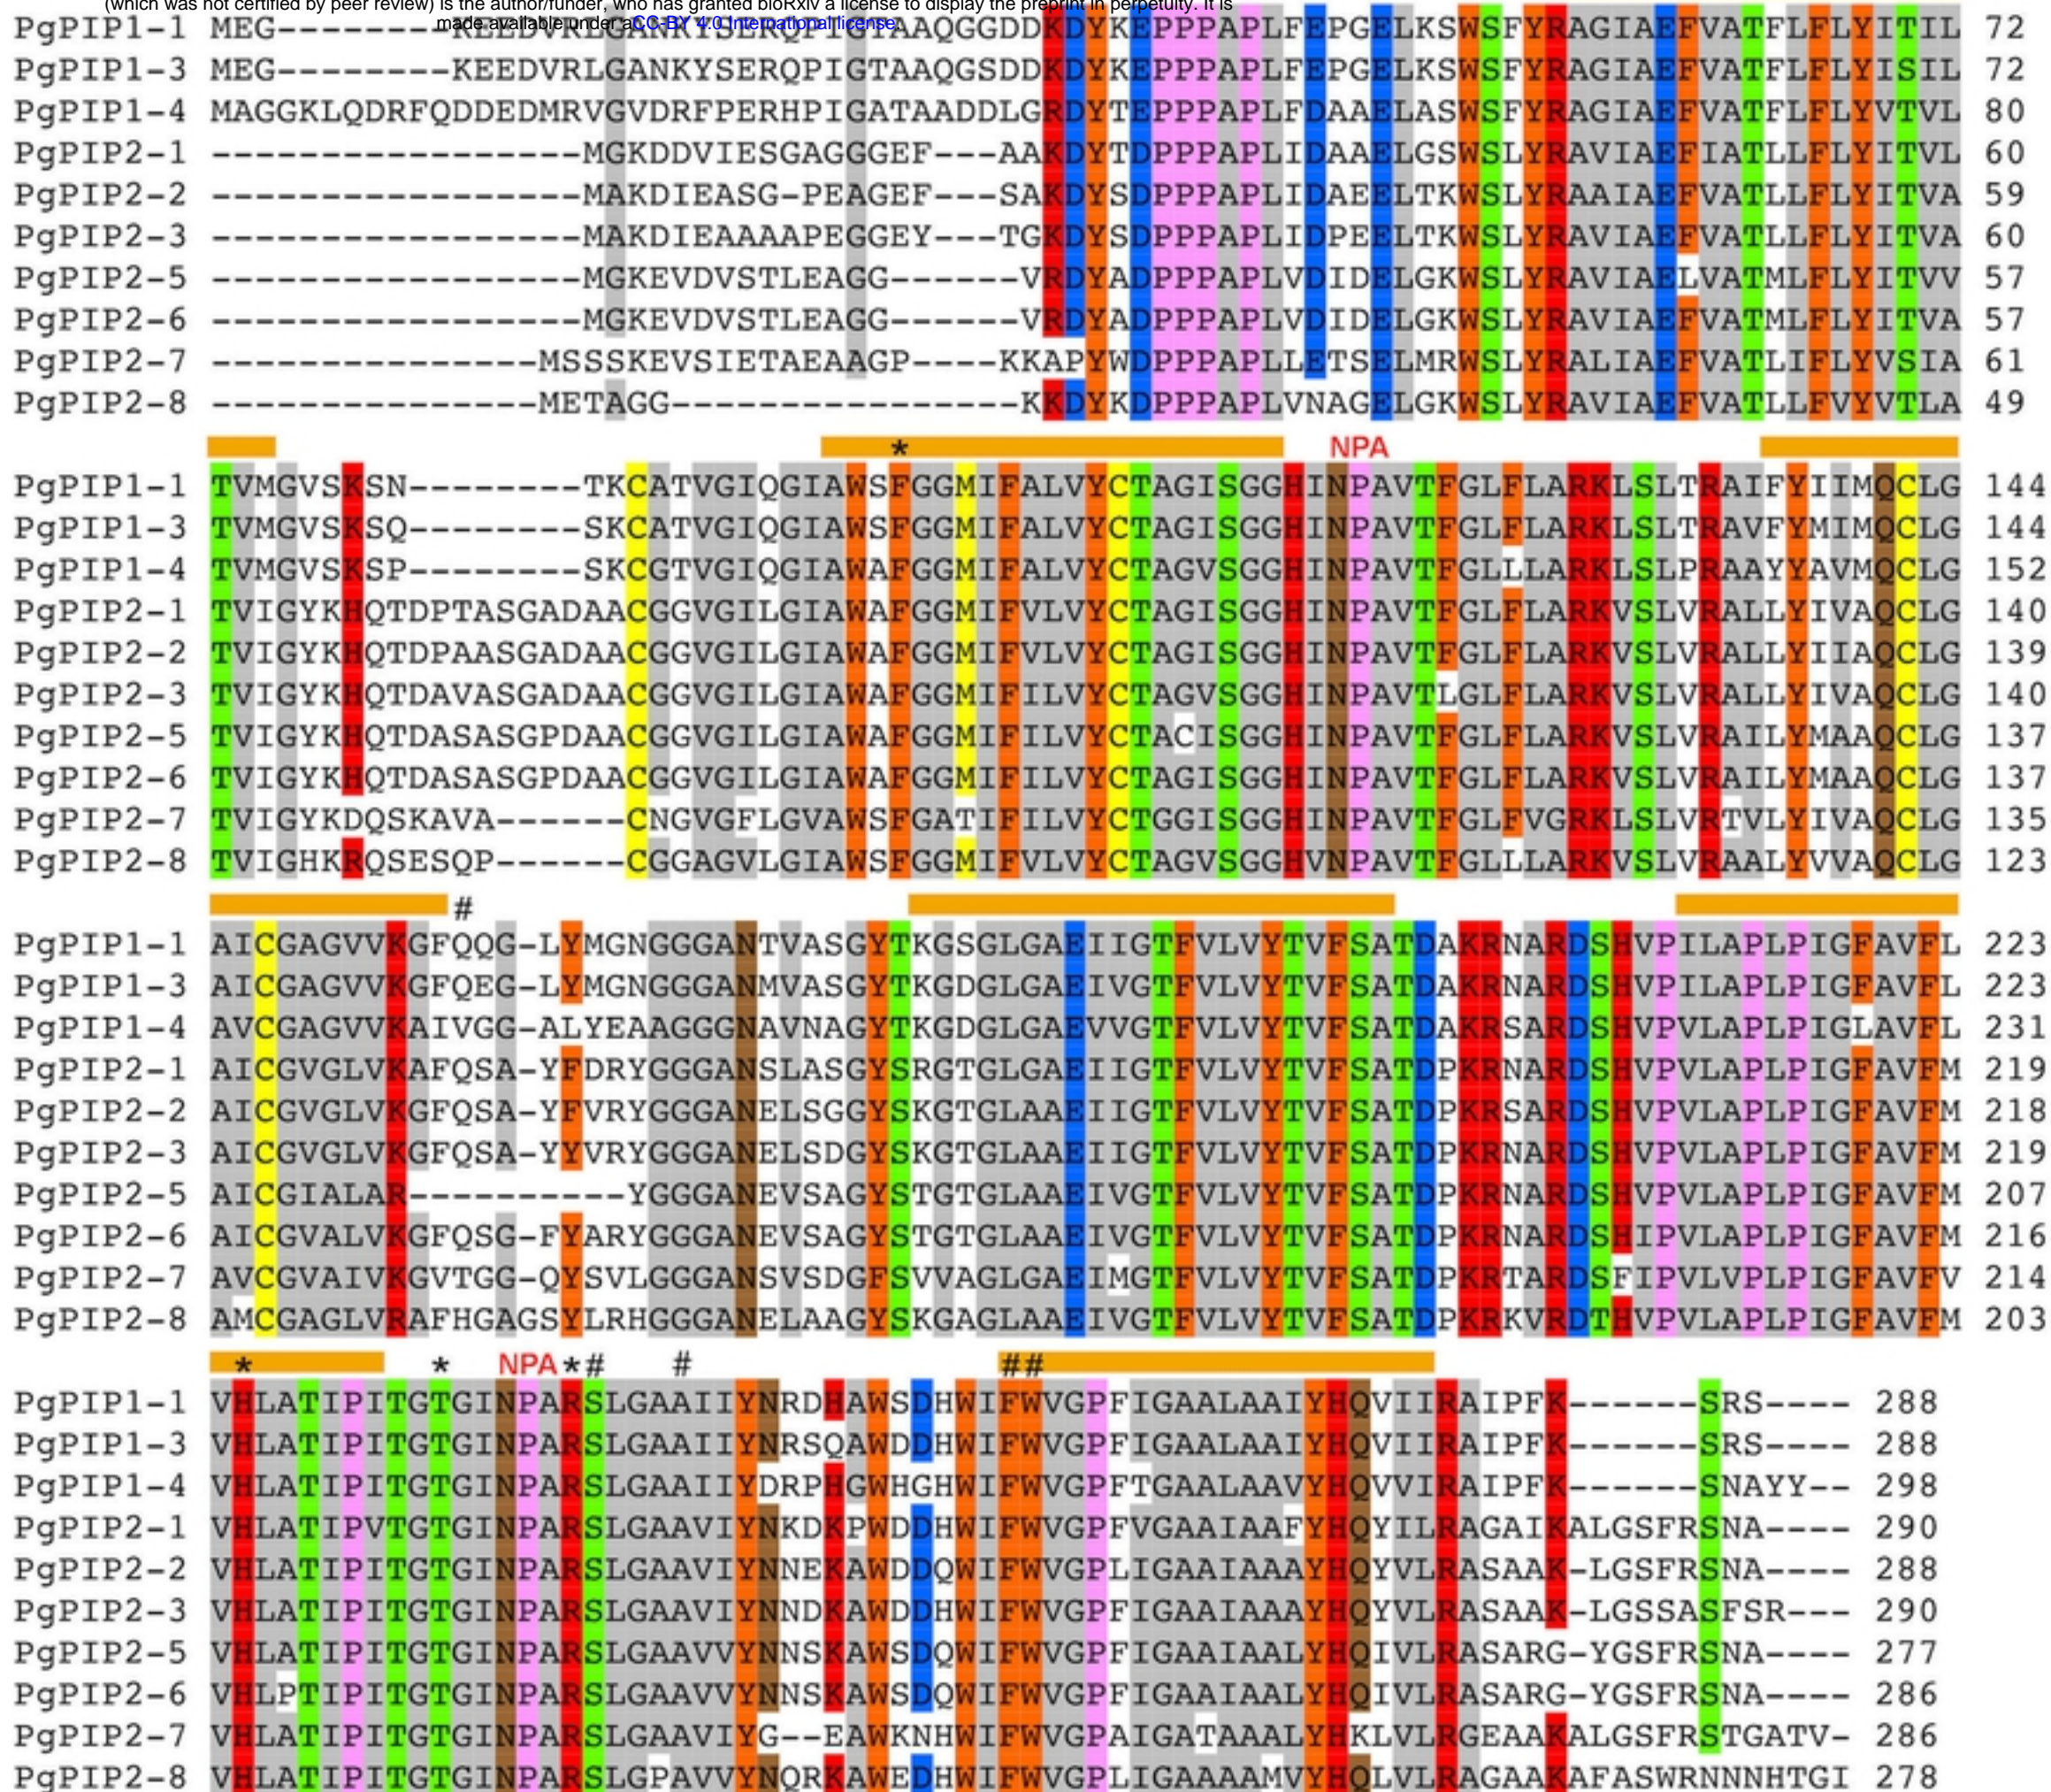

Figure

Relative expression

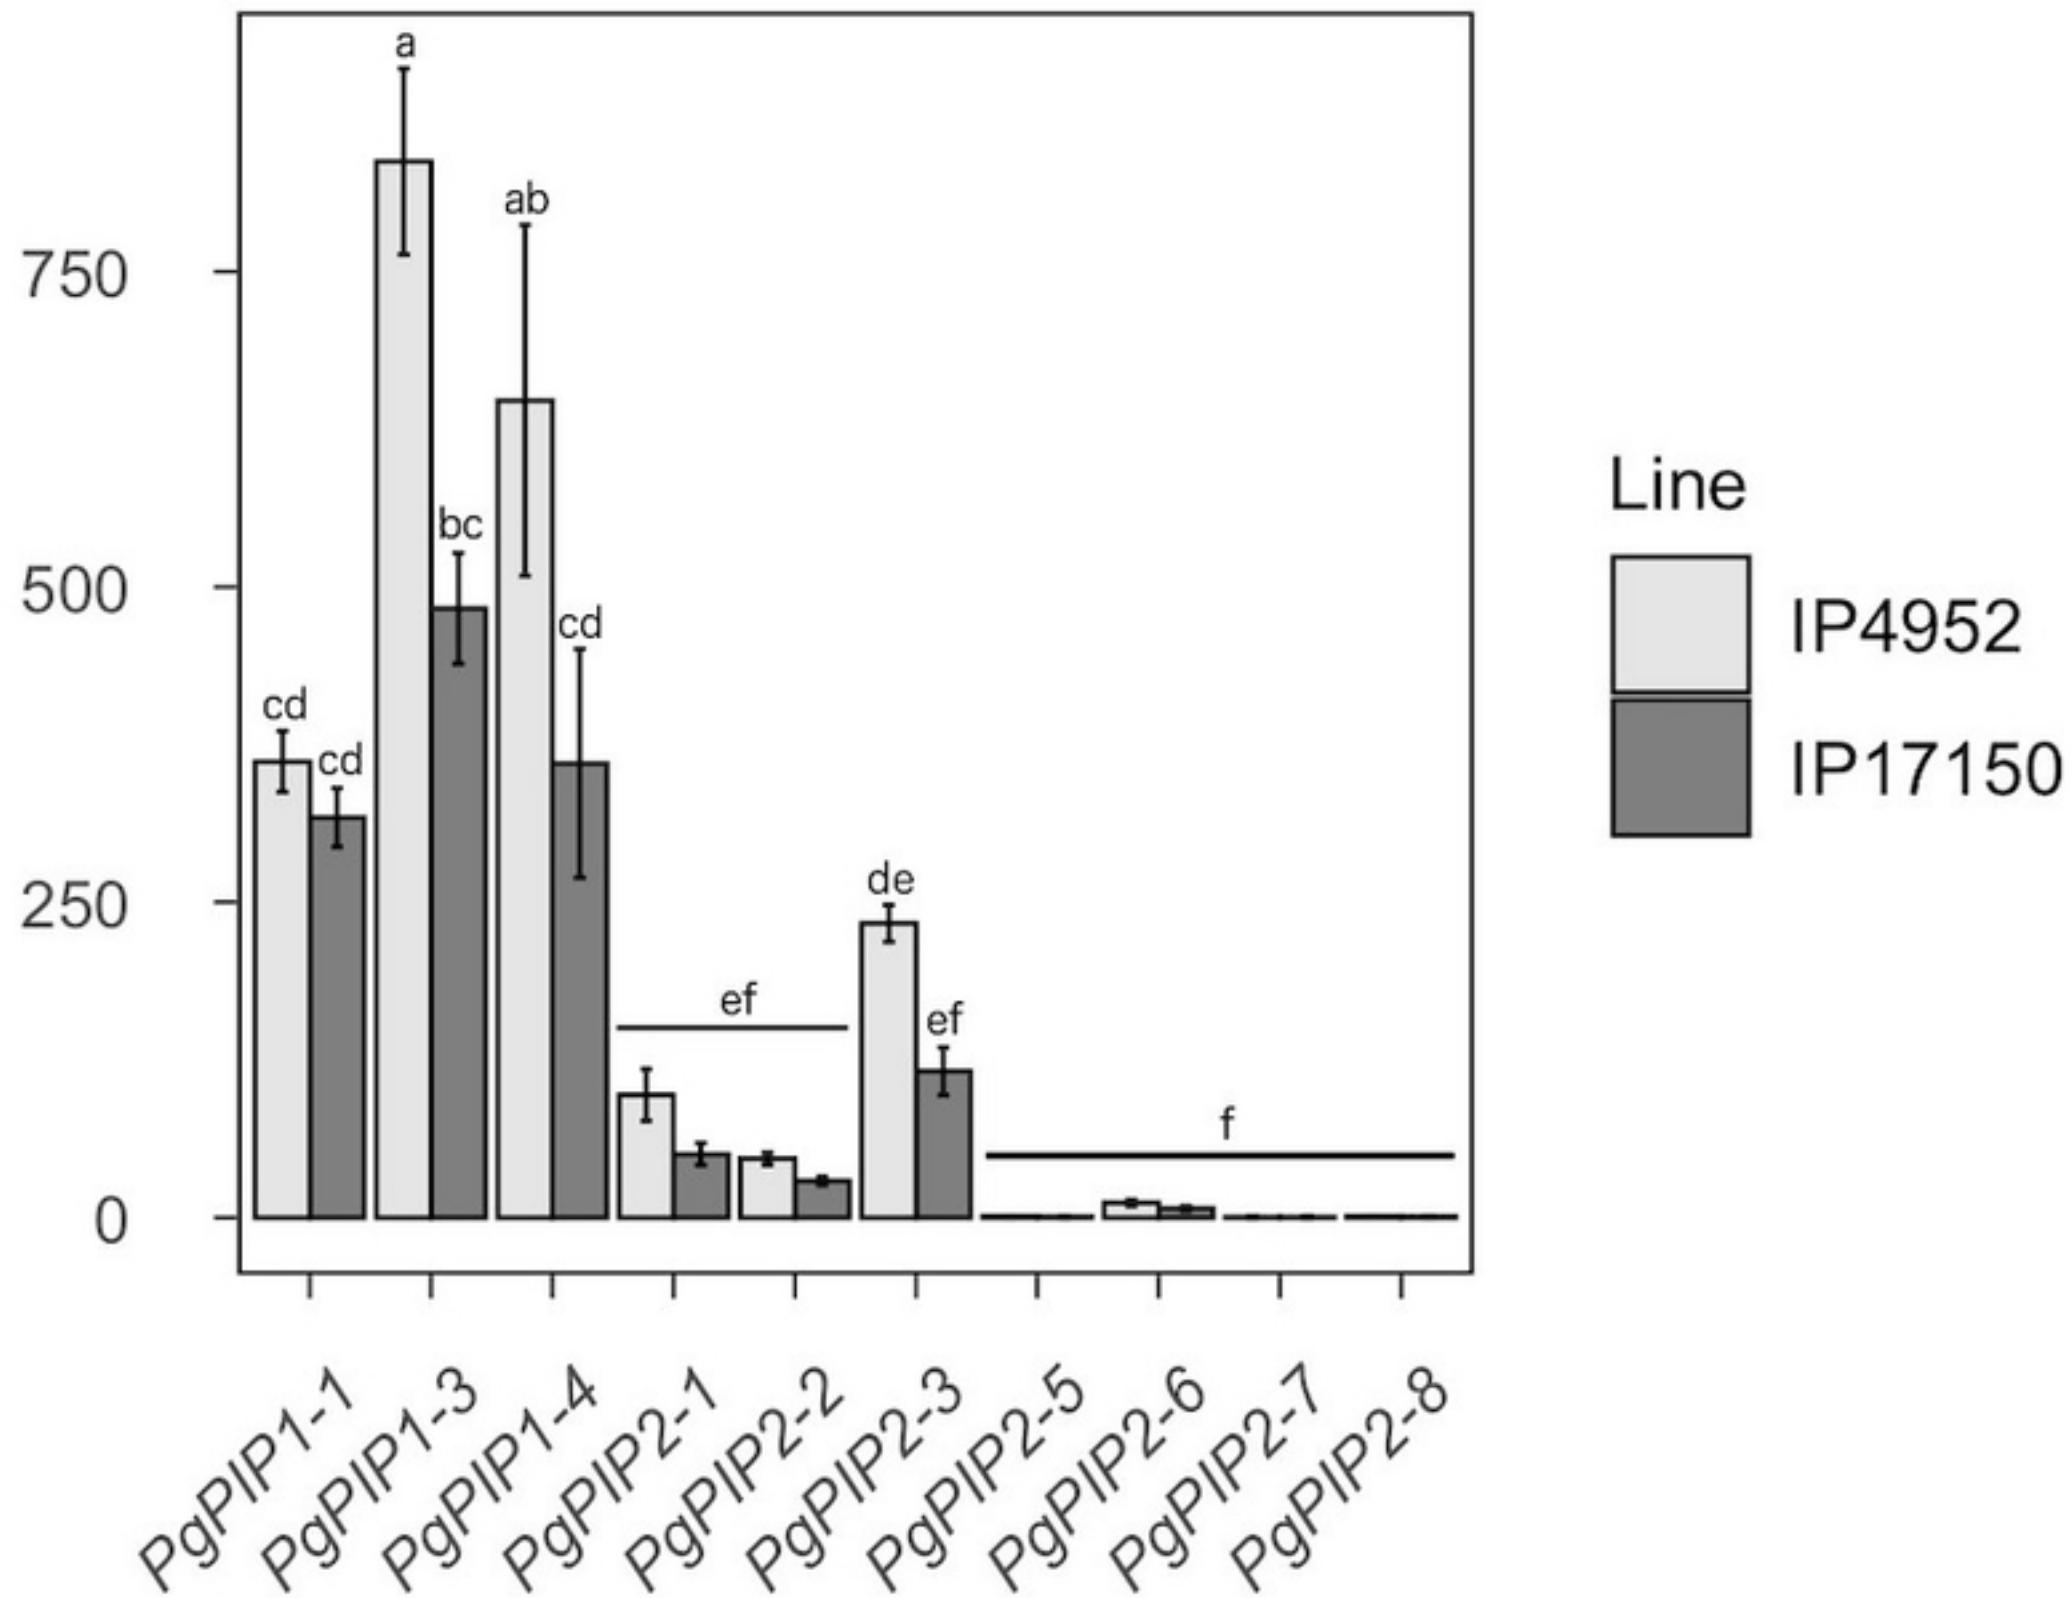

Figure
